# Supplementary material
Source: HighWire-hosted journal article supplement (https://www.life-science-alliance.org/content/5/6/e202101226/F3)

Figure 1.E

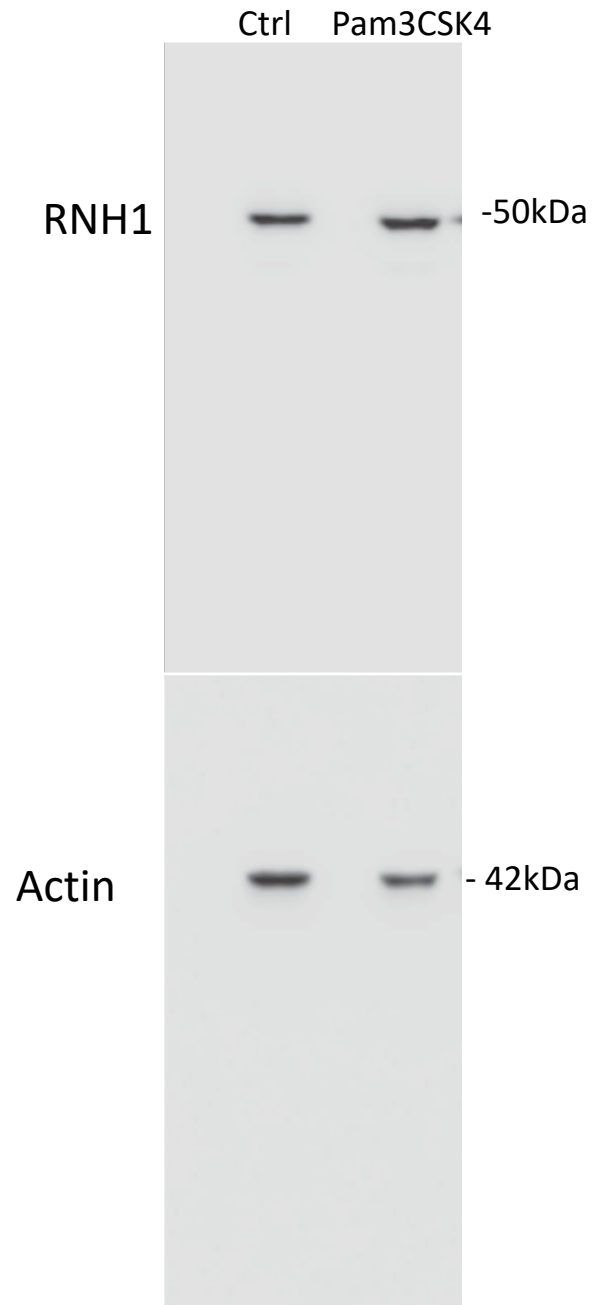

Figure 1.F

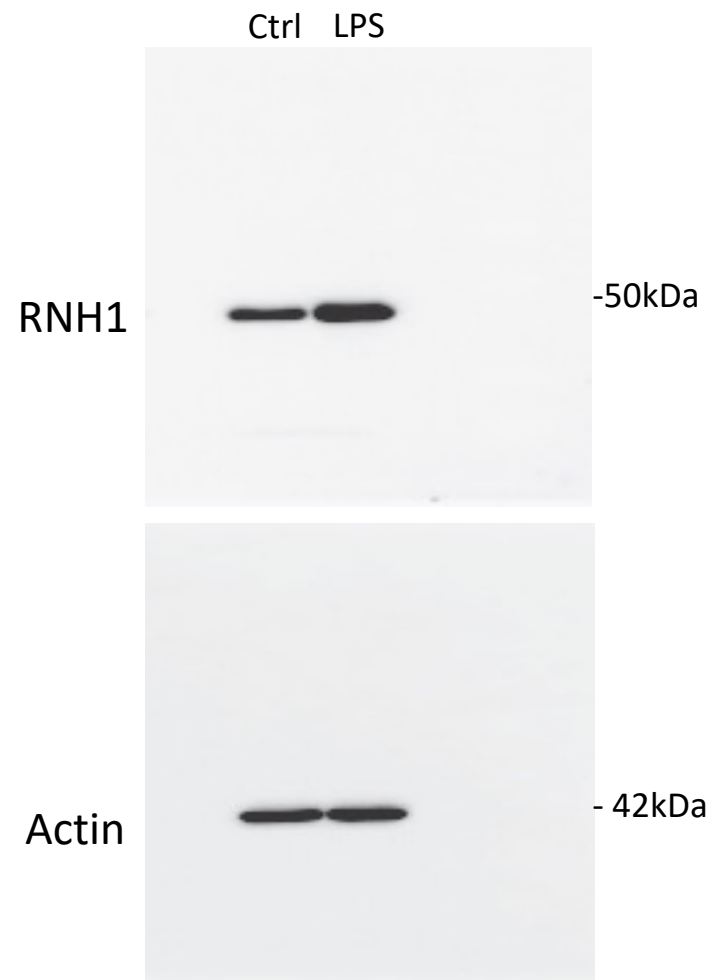

Figure.2B

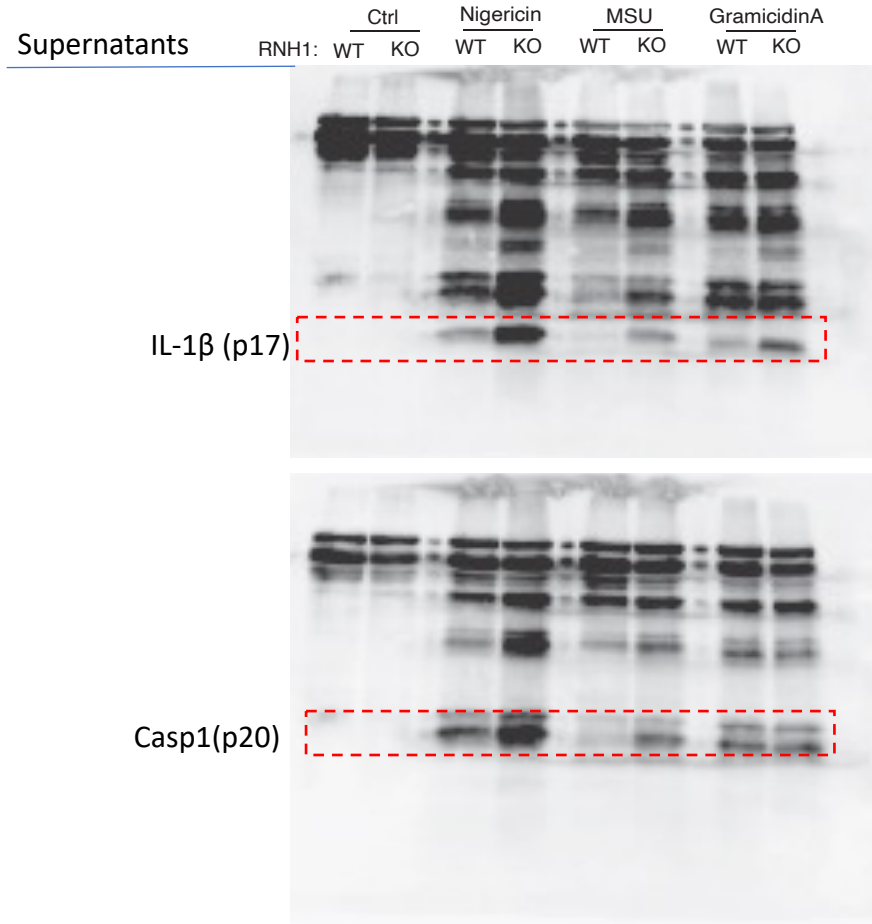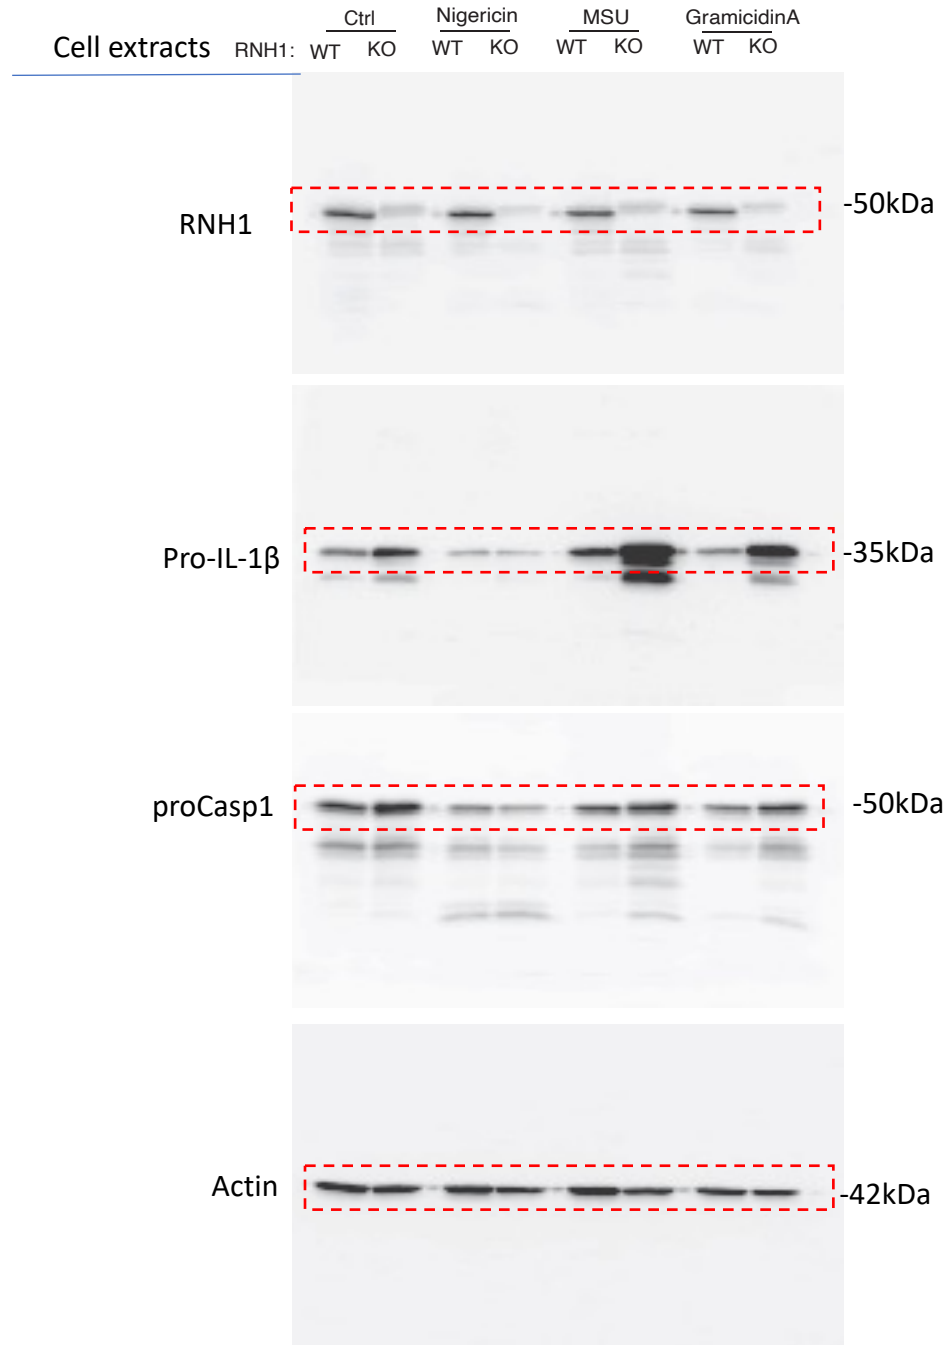

Figure.2D

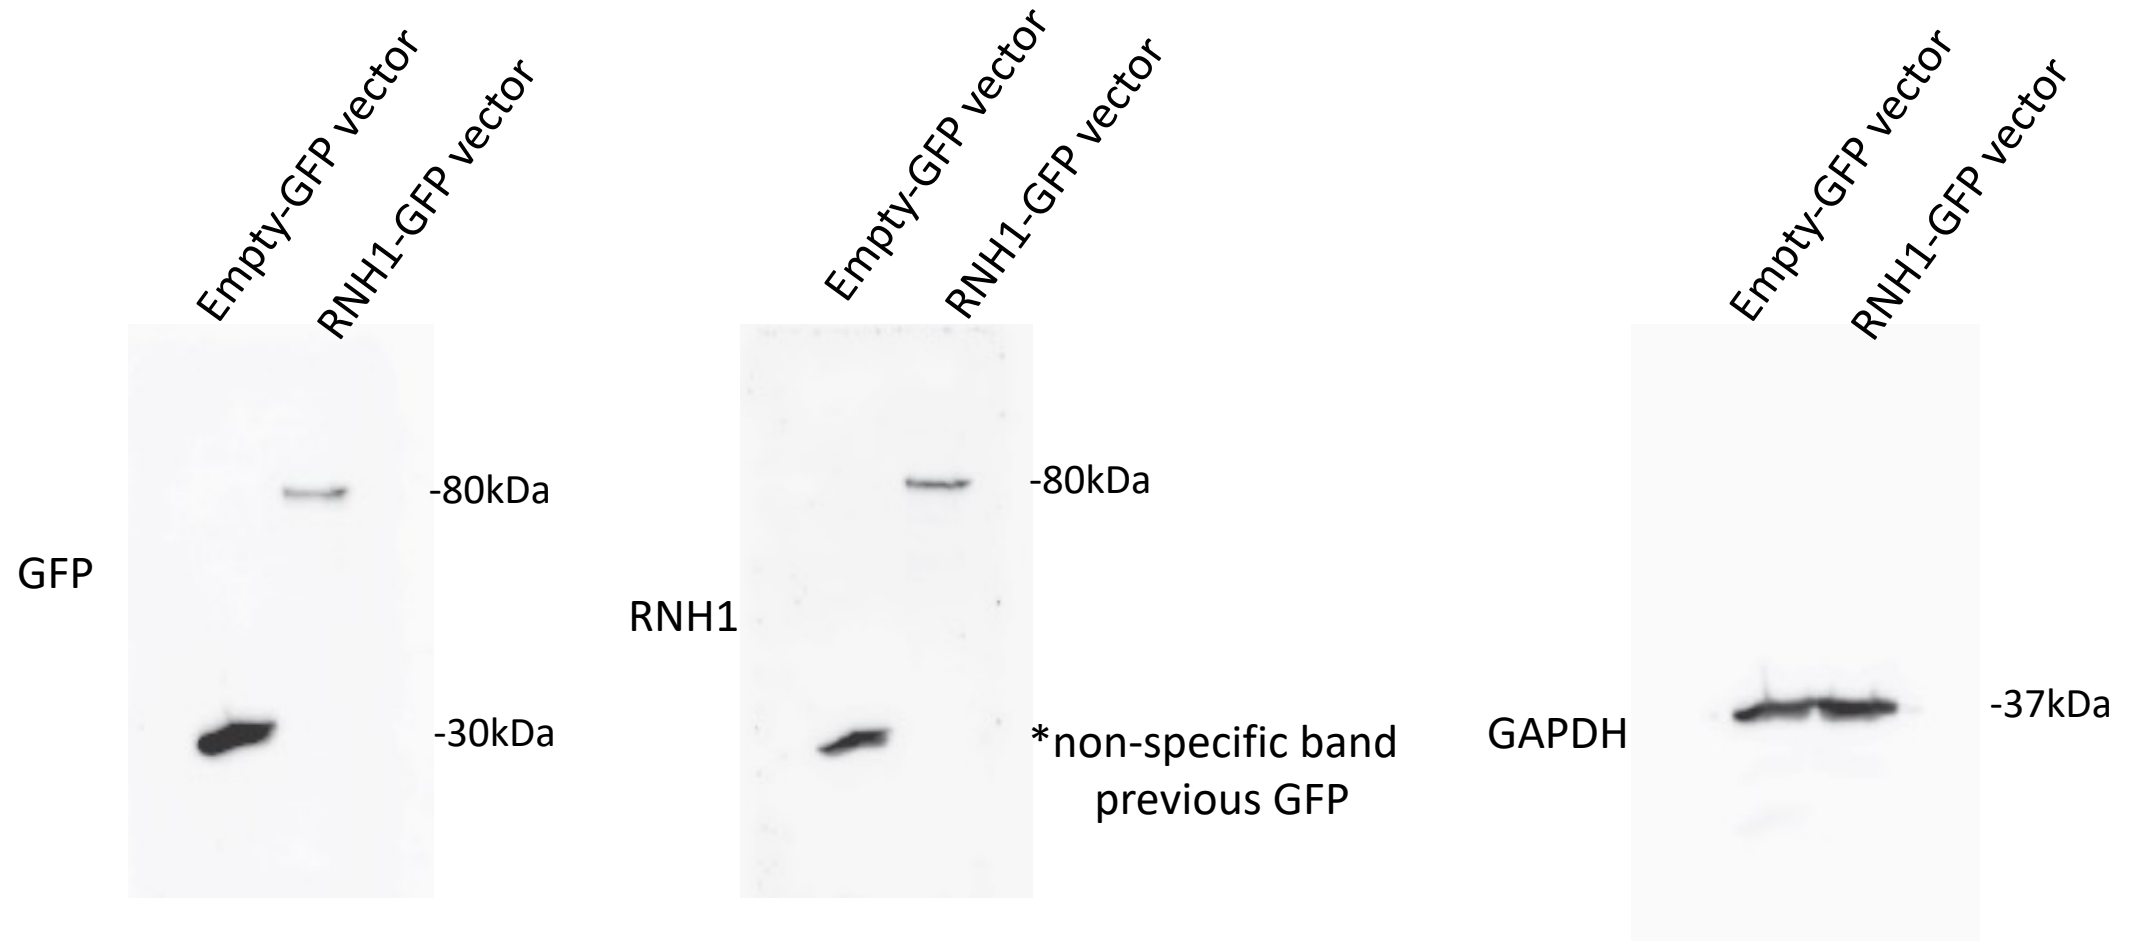

Figure.2F

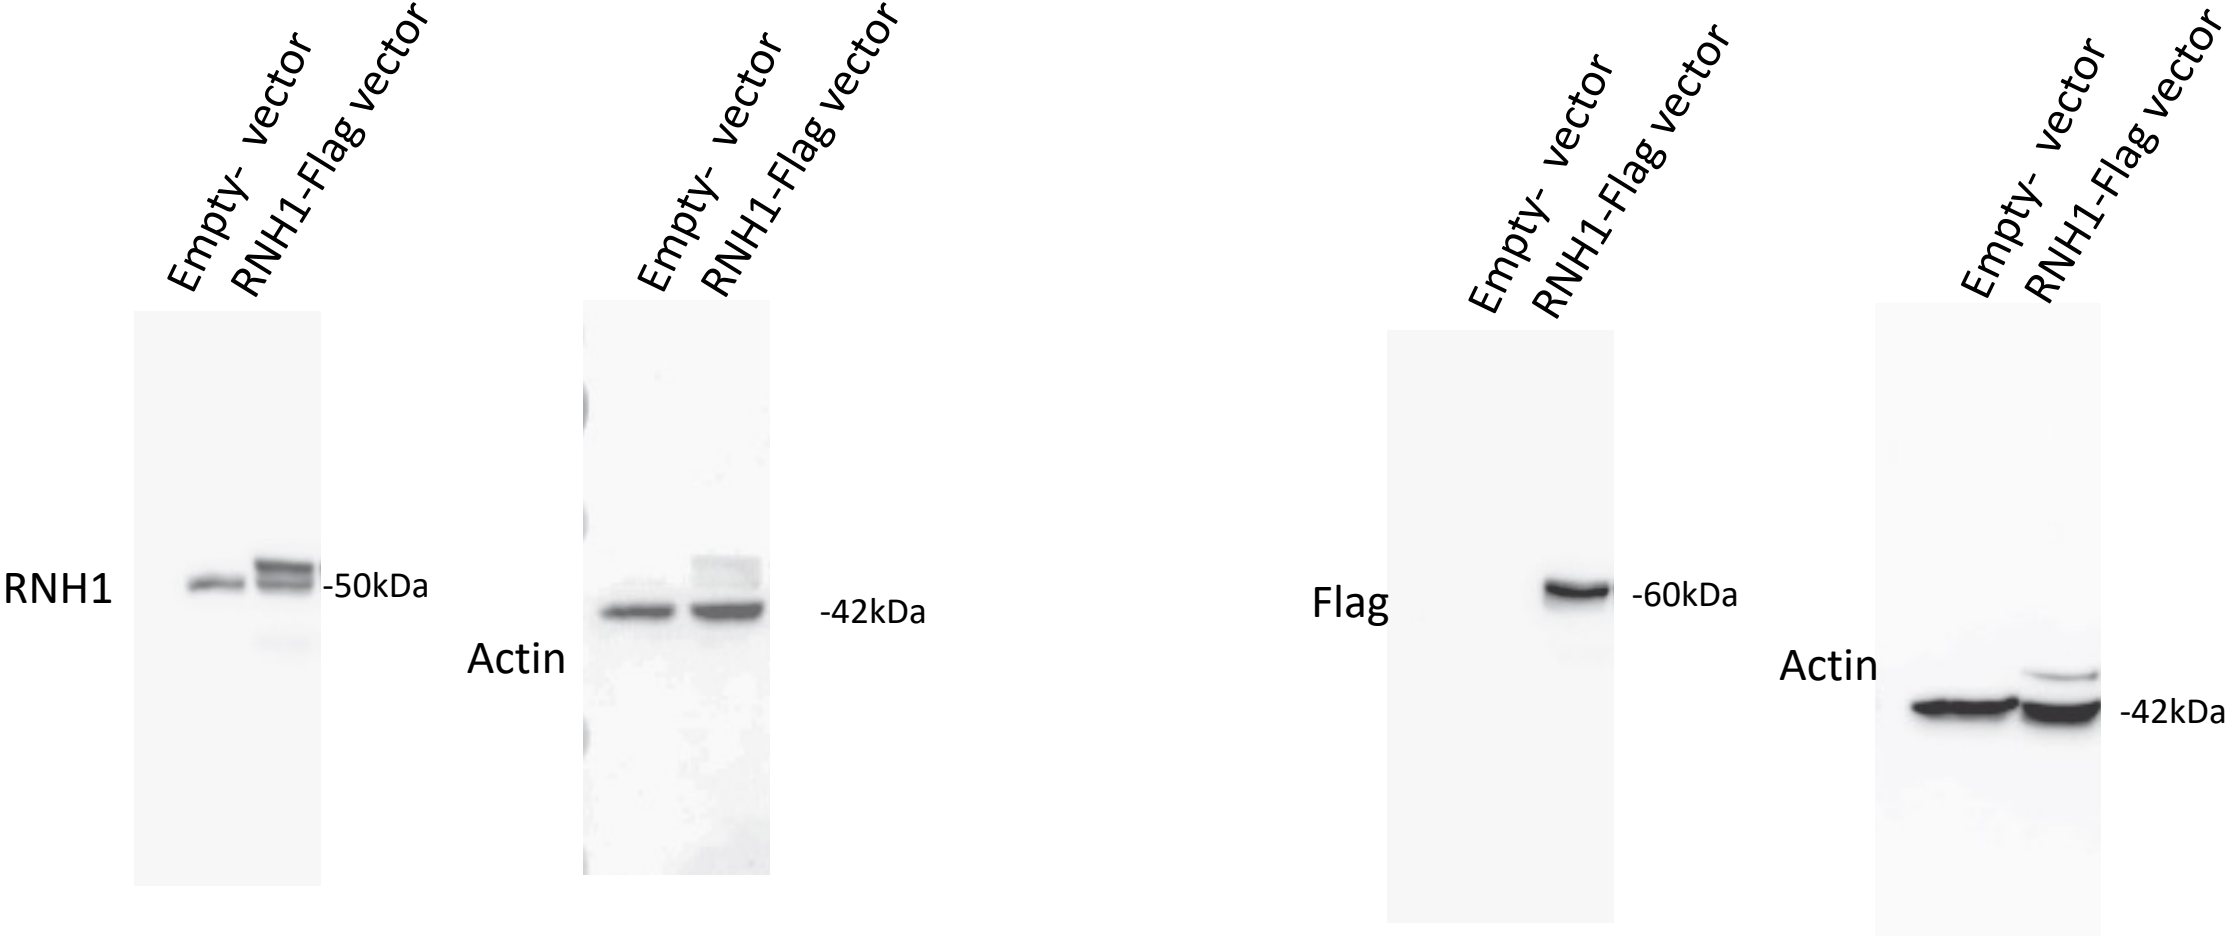

Figure.3A

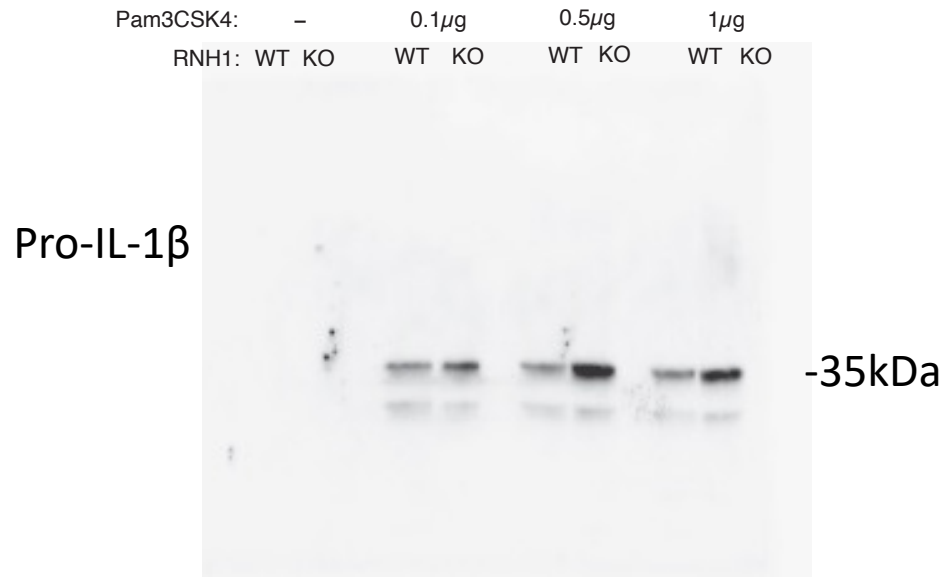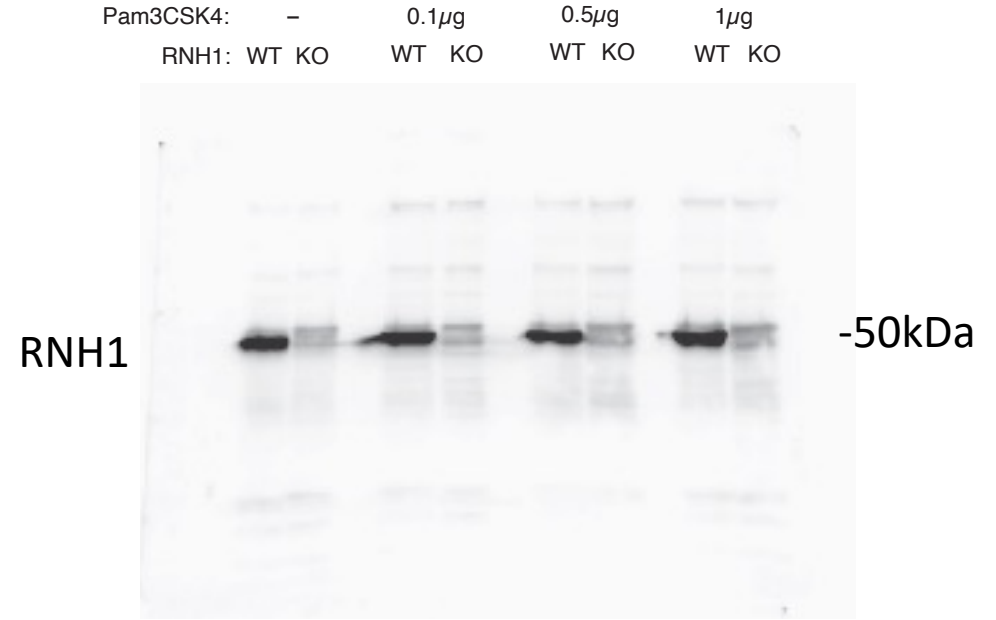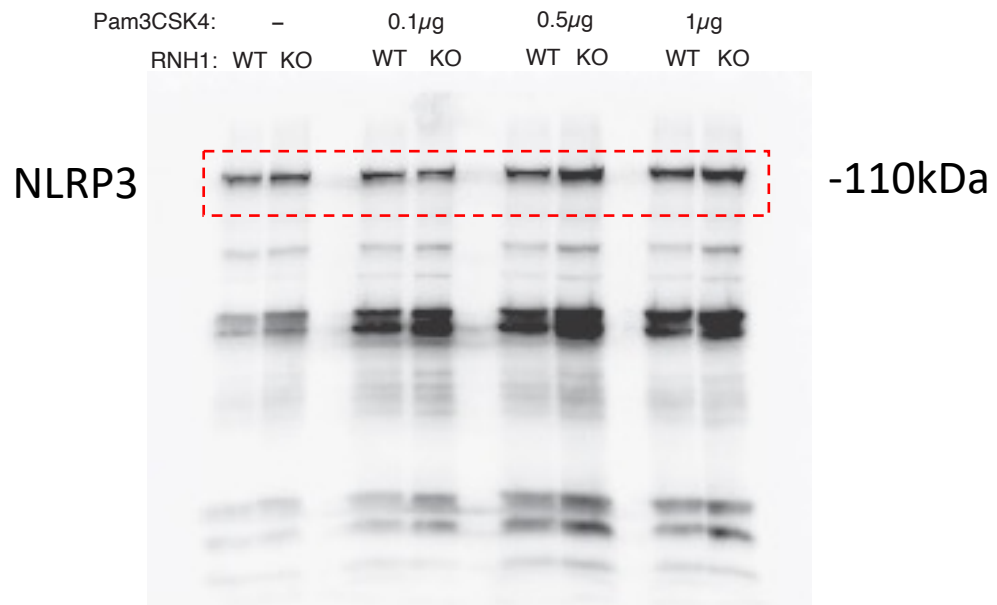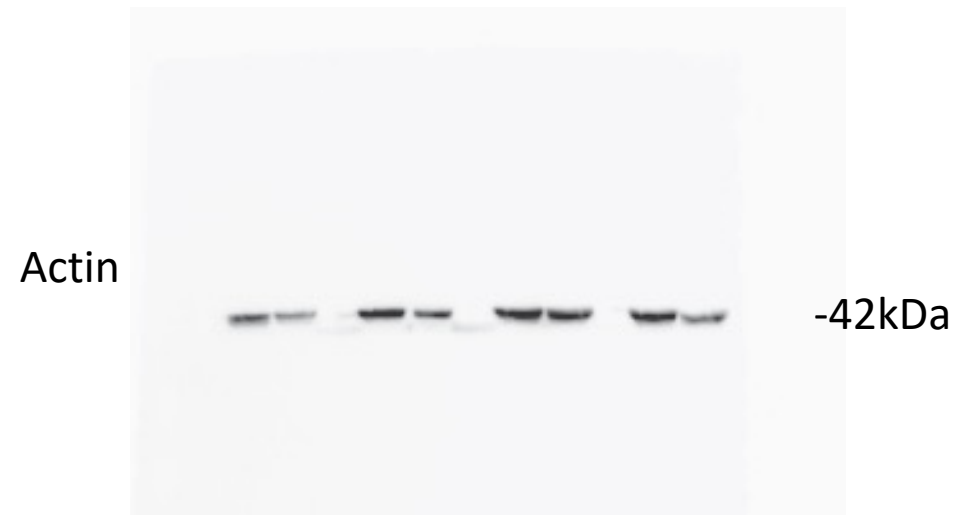

**Figure.3B**

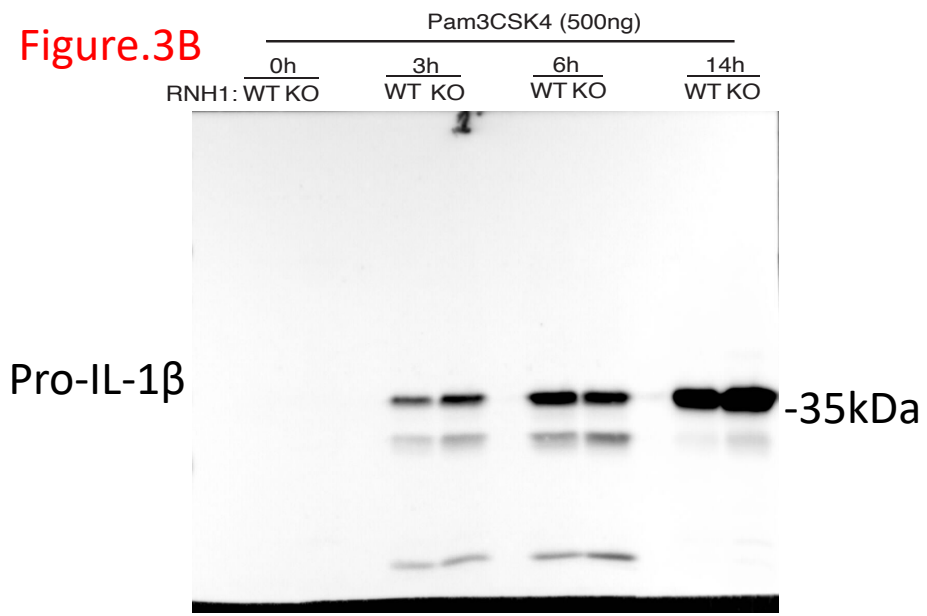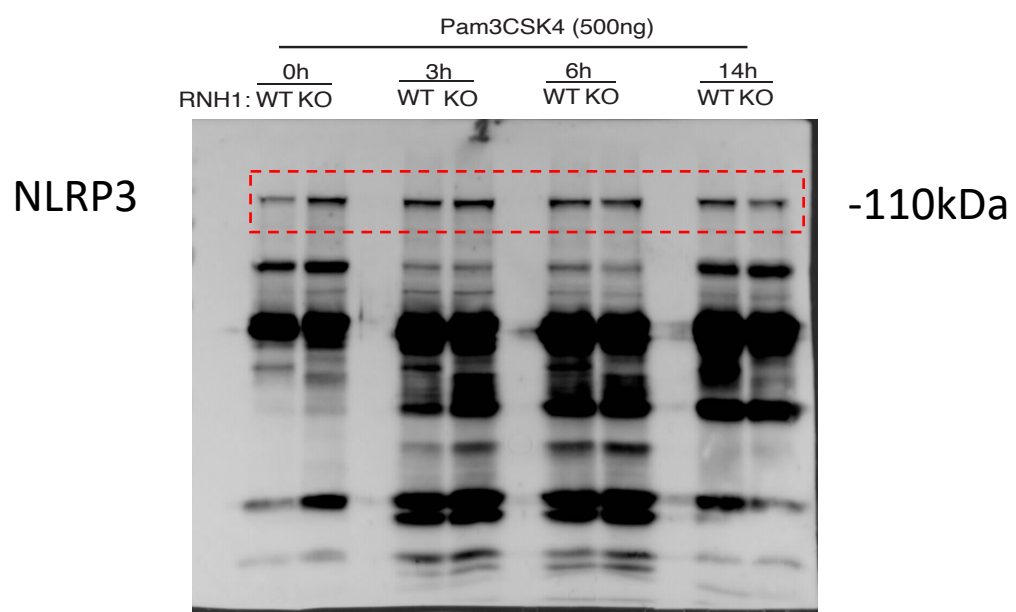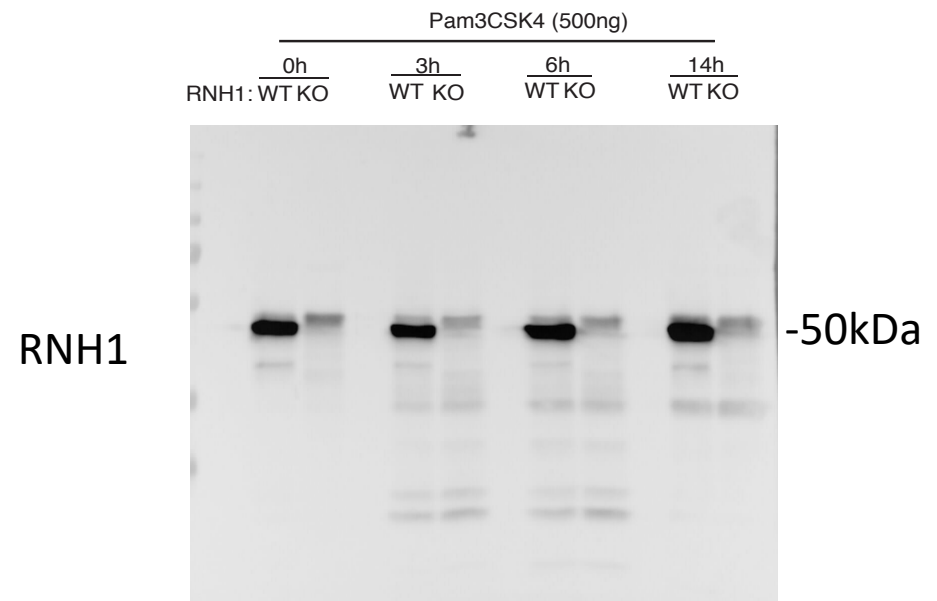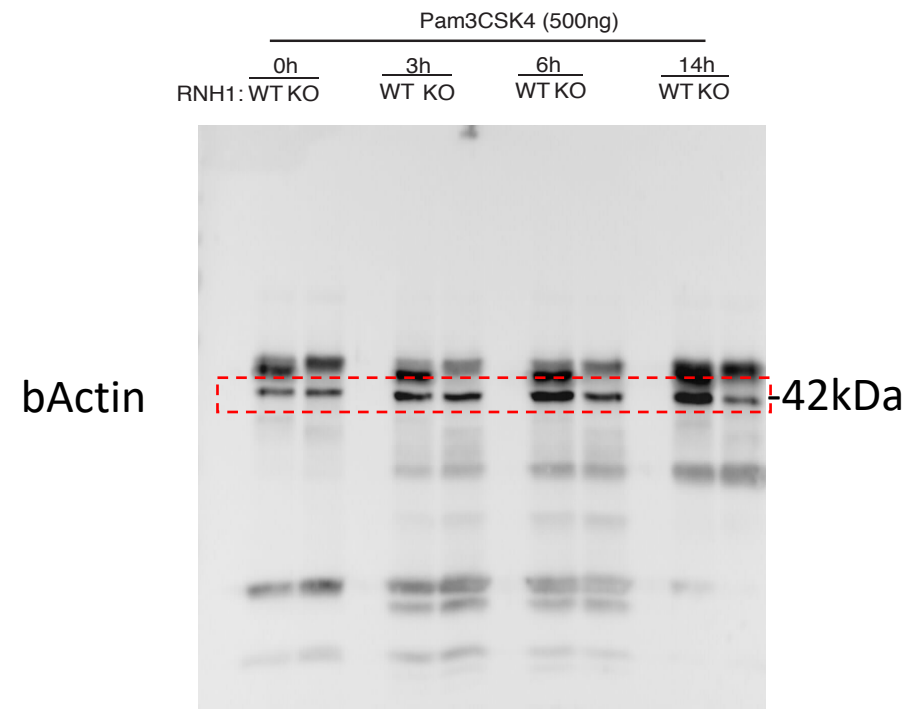

**Figure.3C**

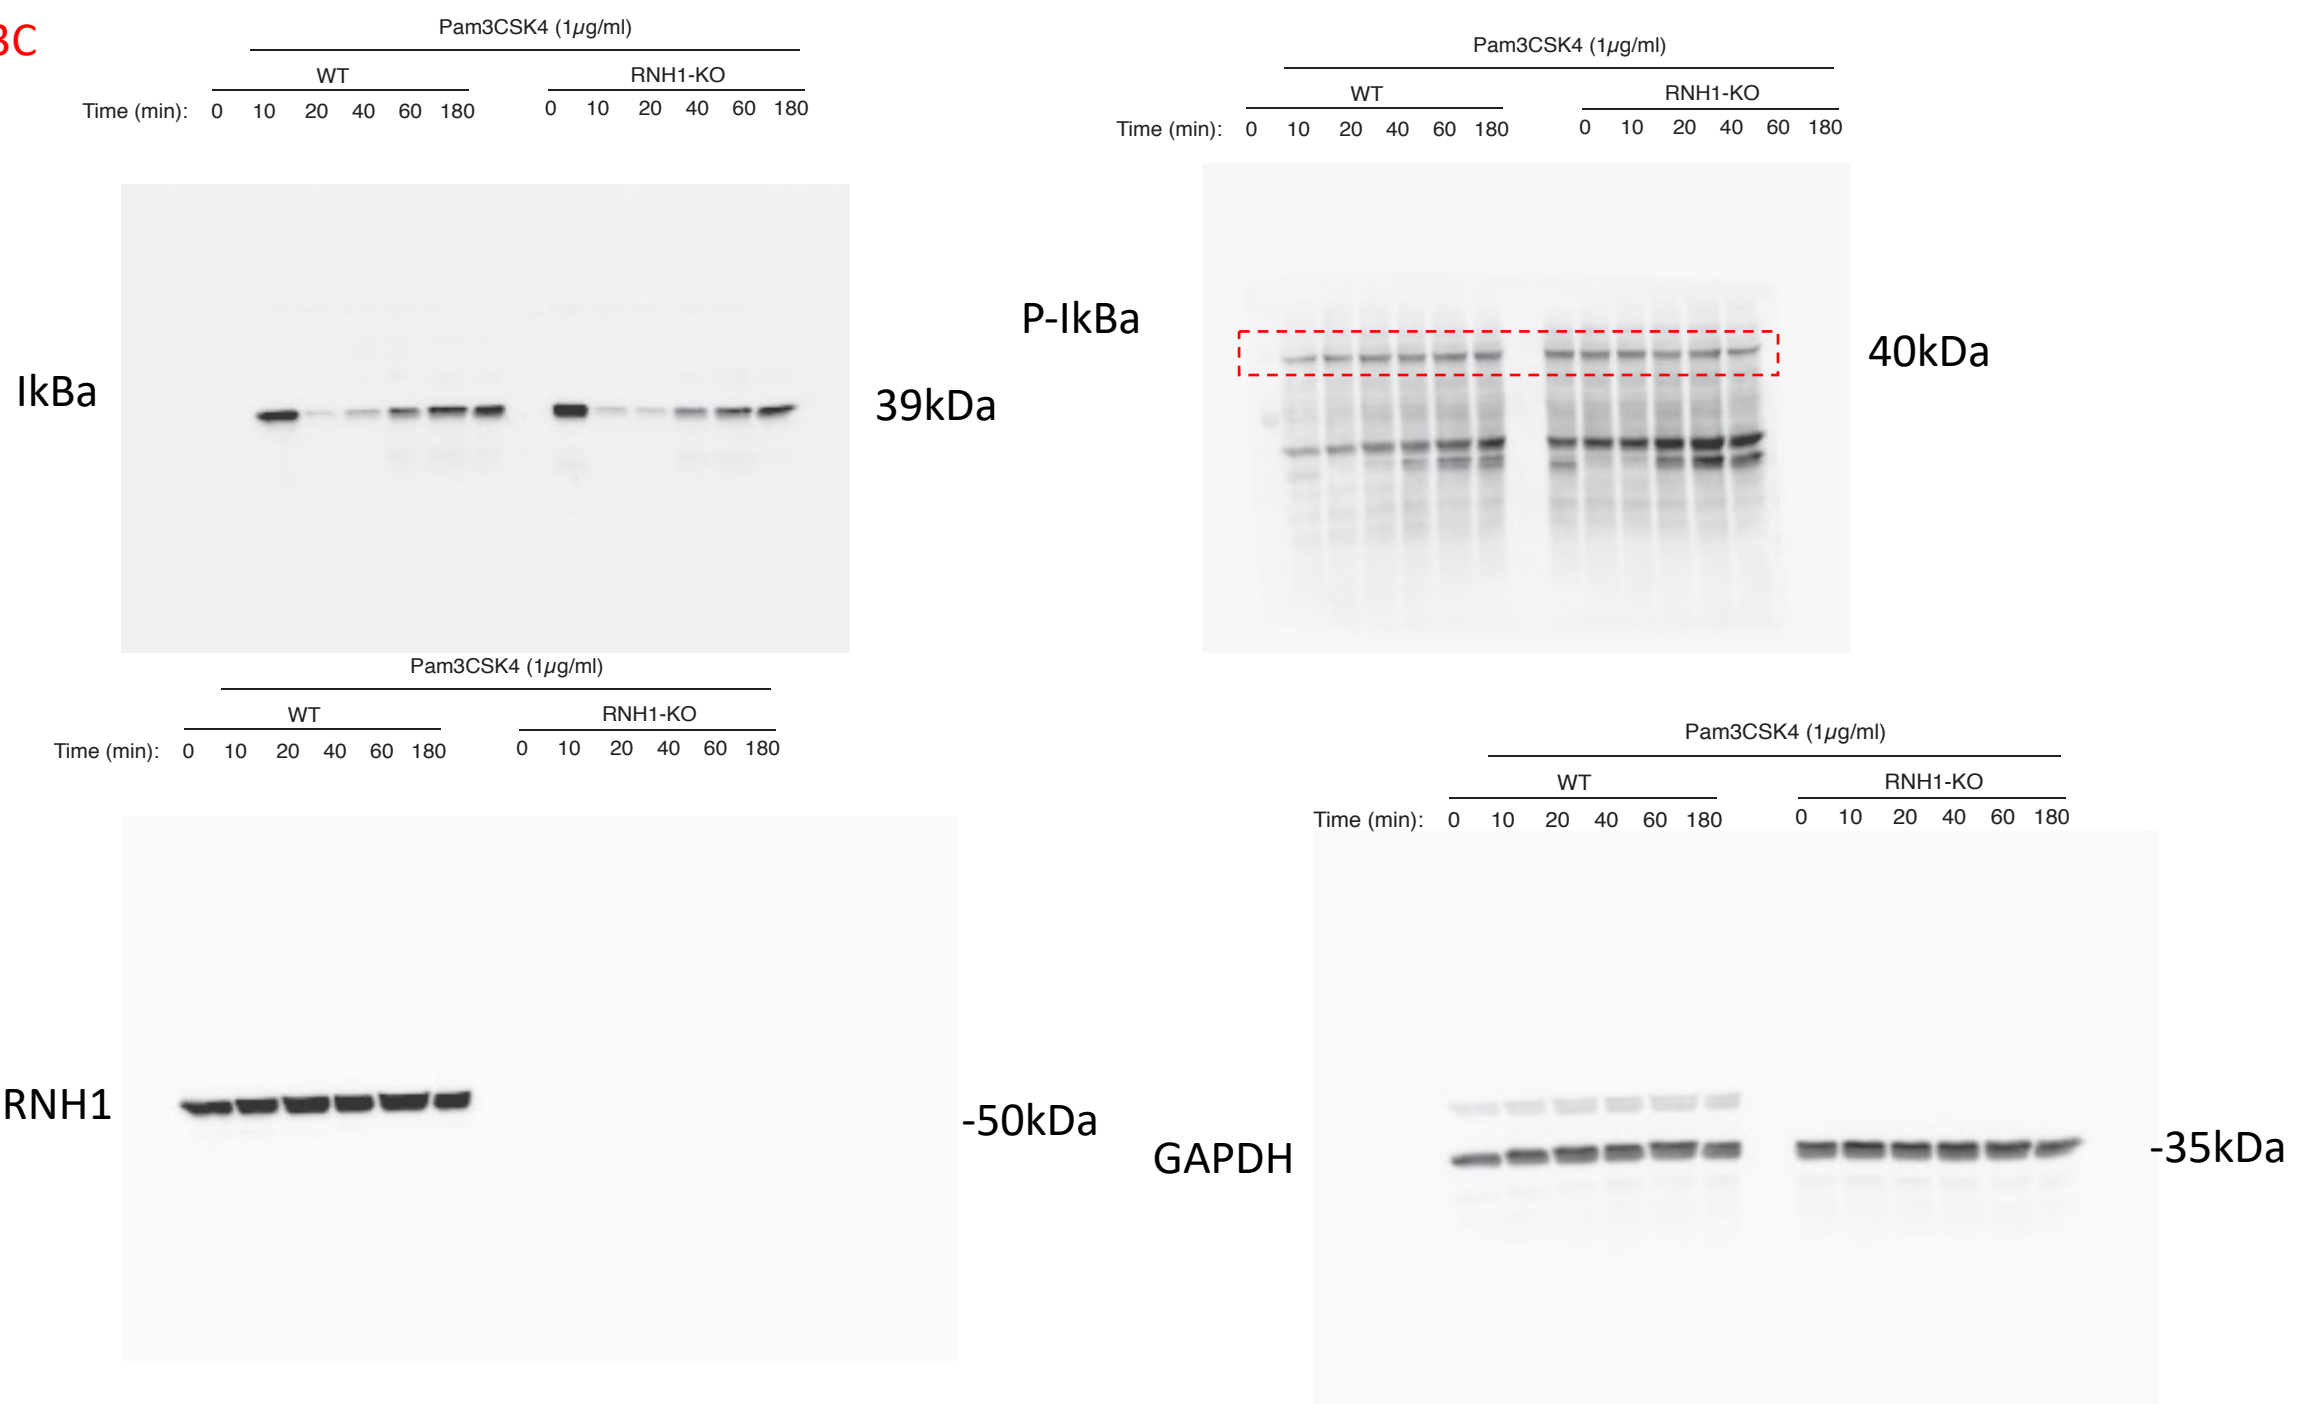

Figure.3G

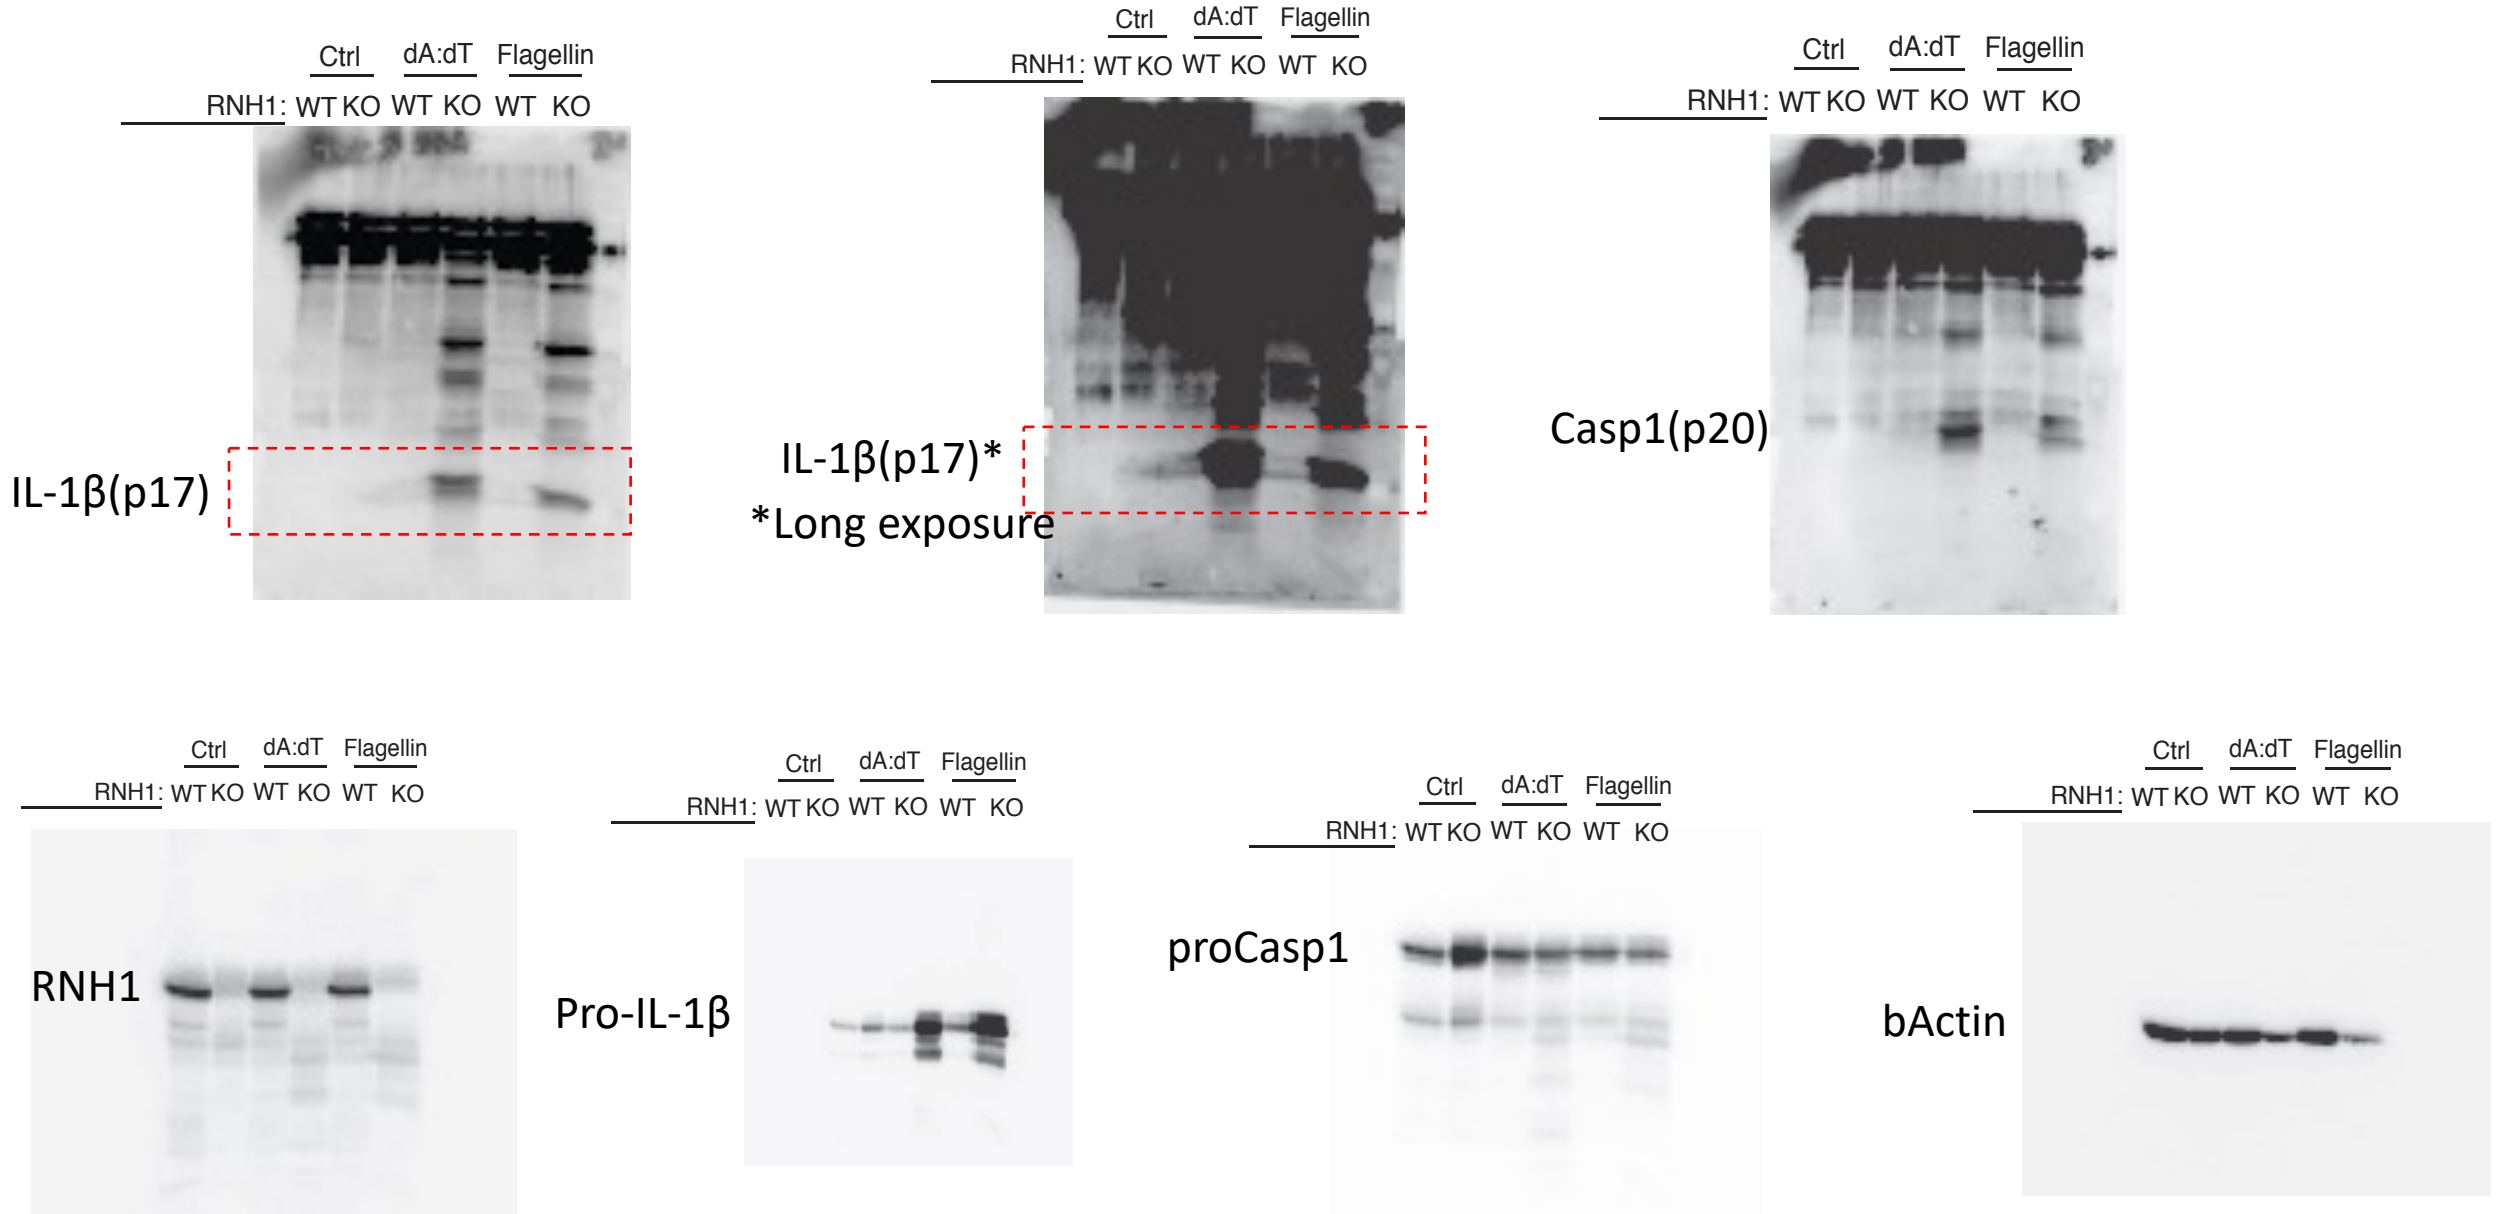



Figure.4A

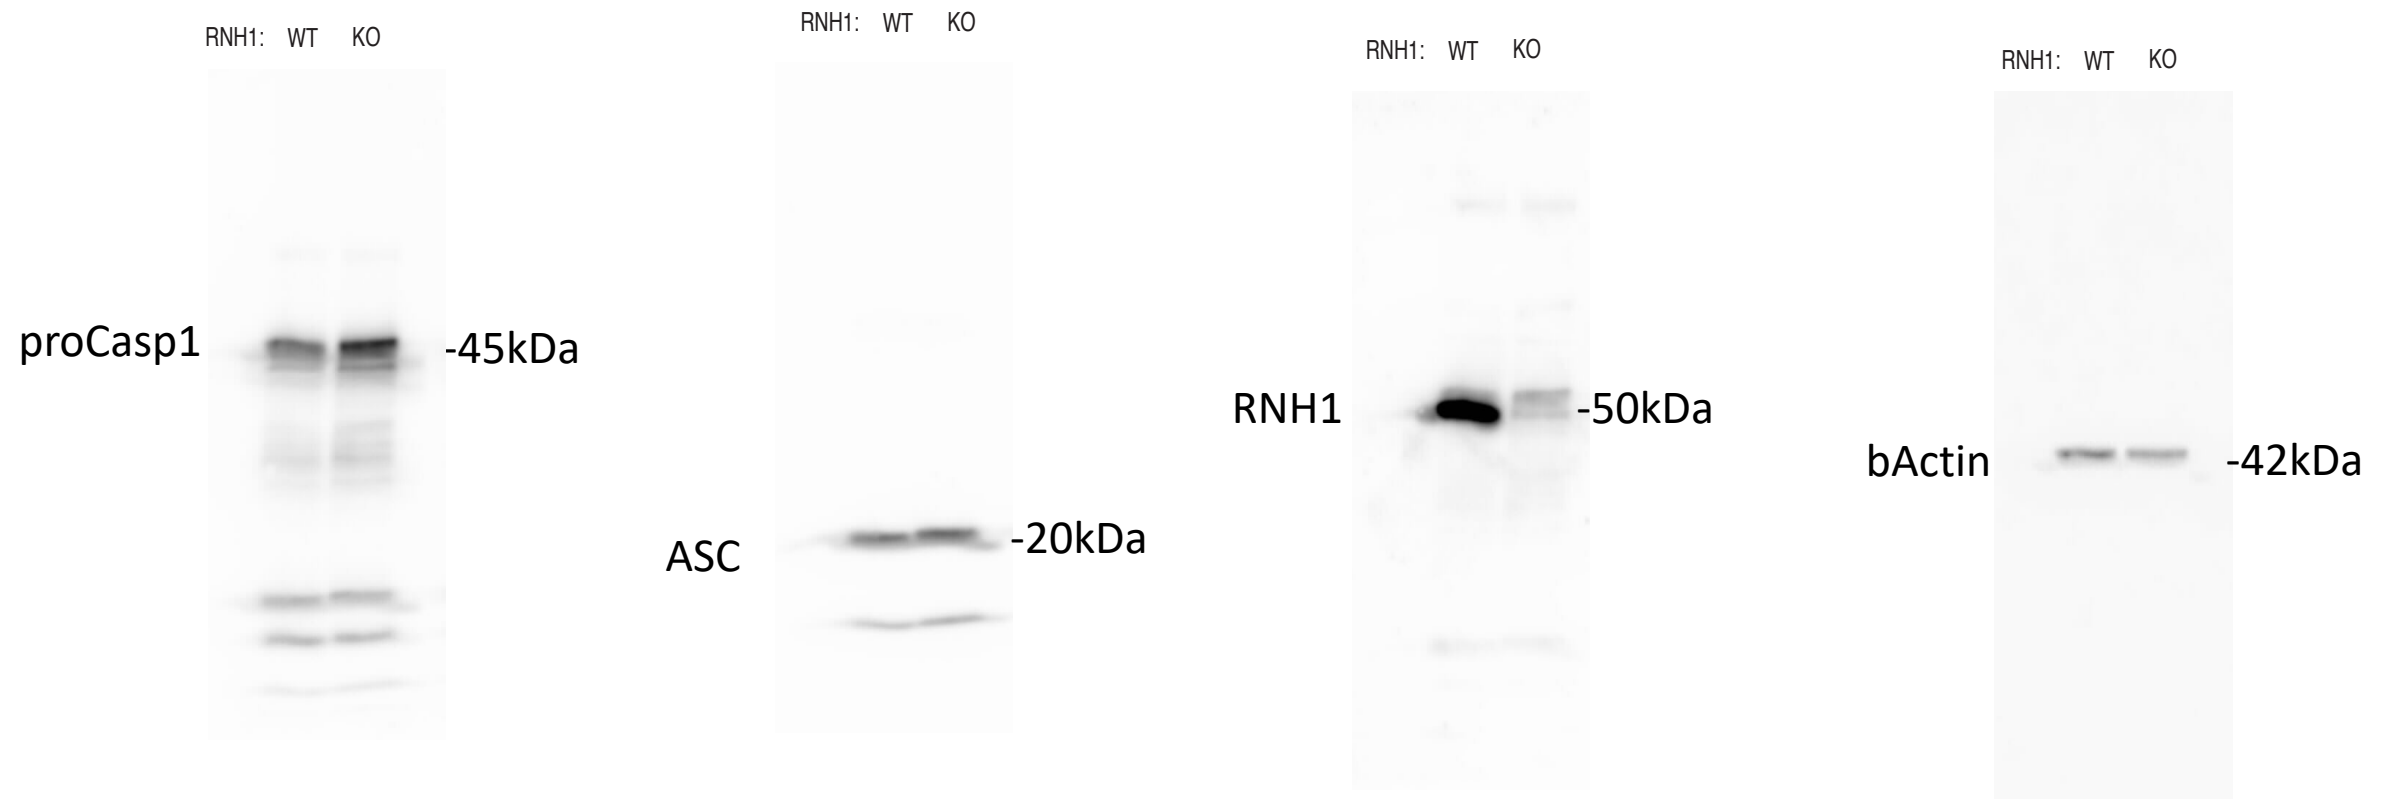

Figure.4C

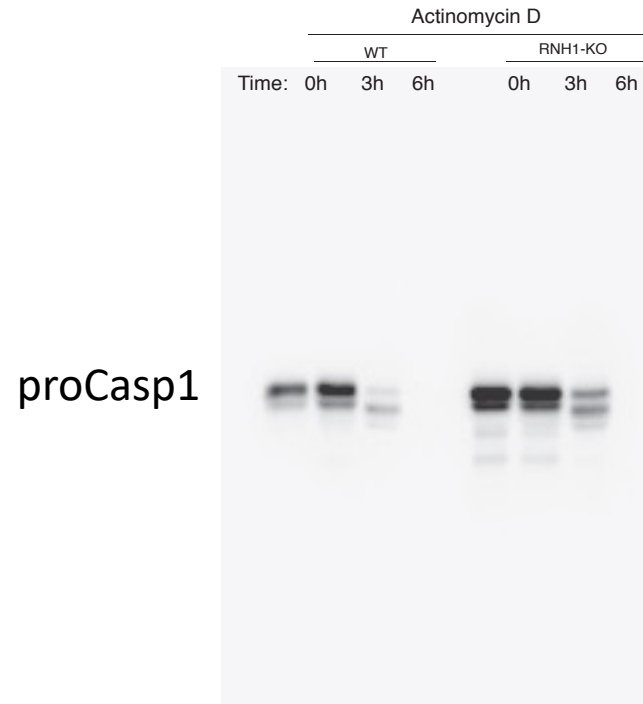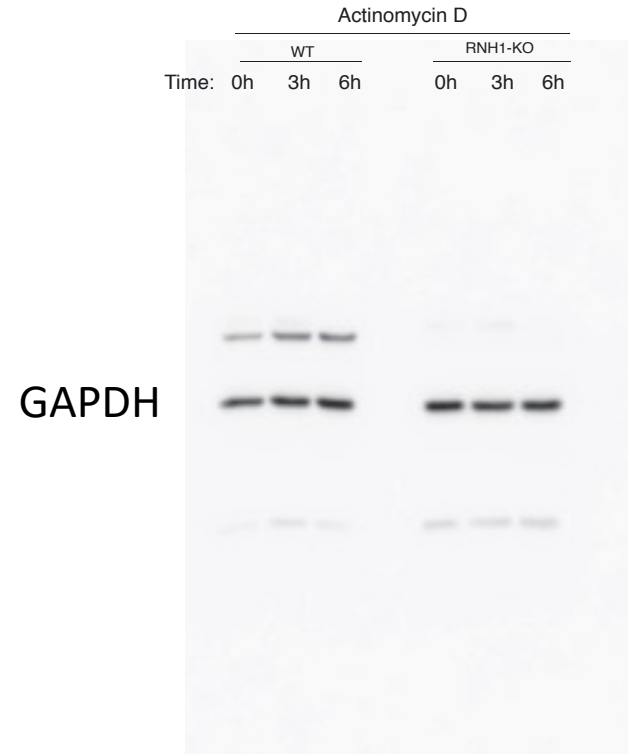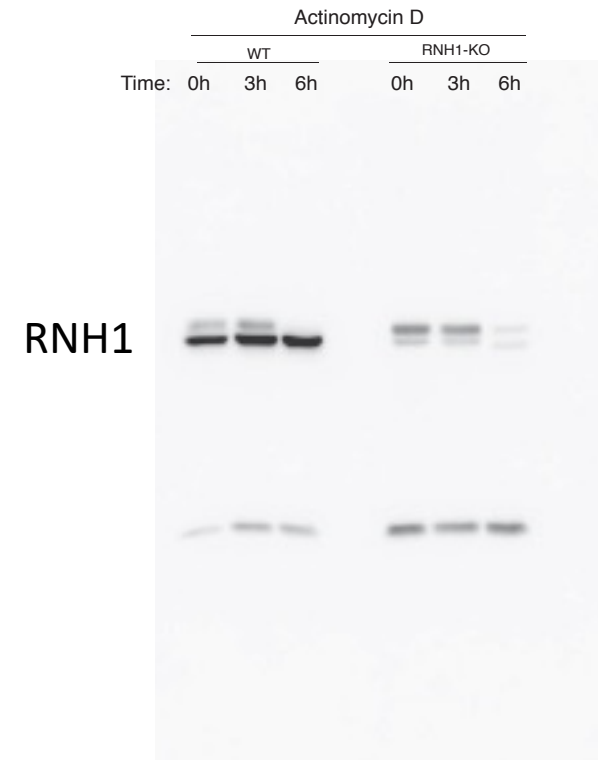

Figure.4D

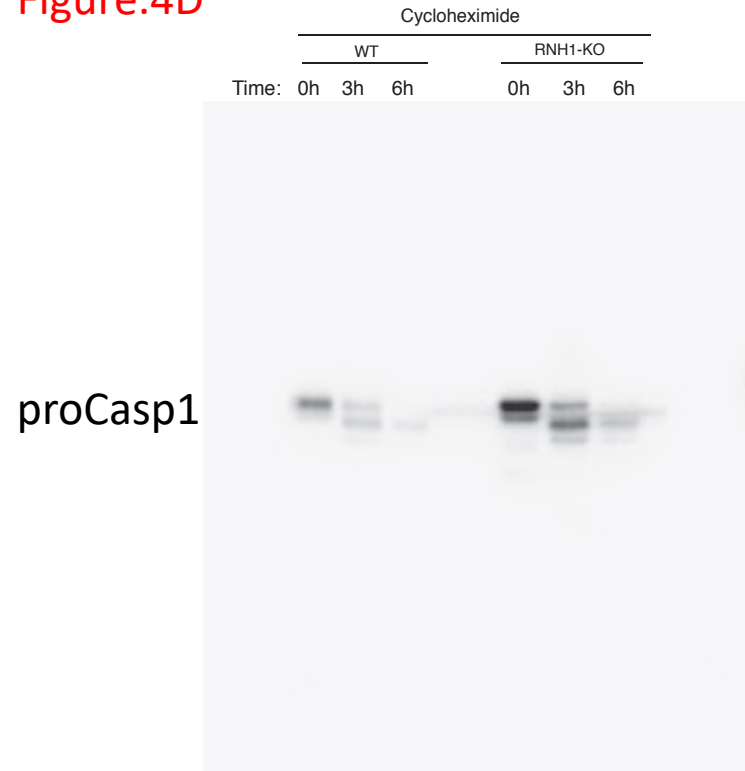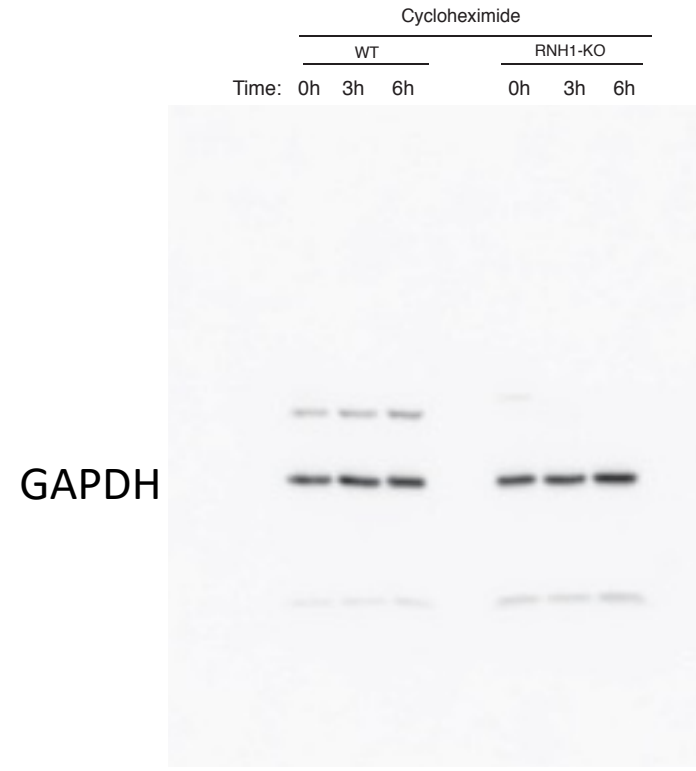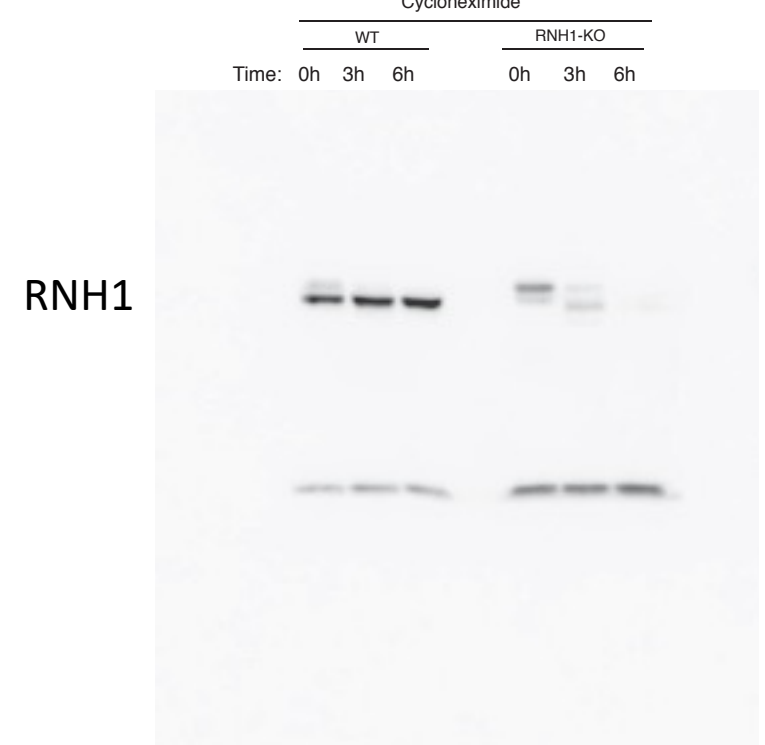

Figure.4E

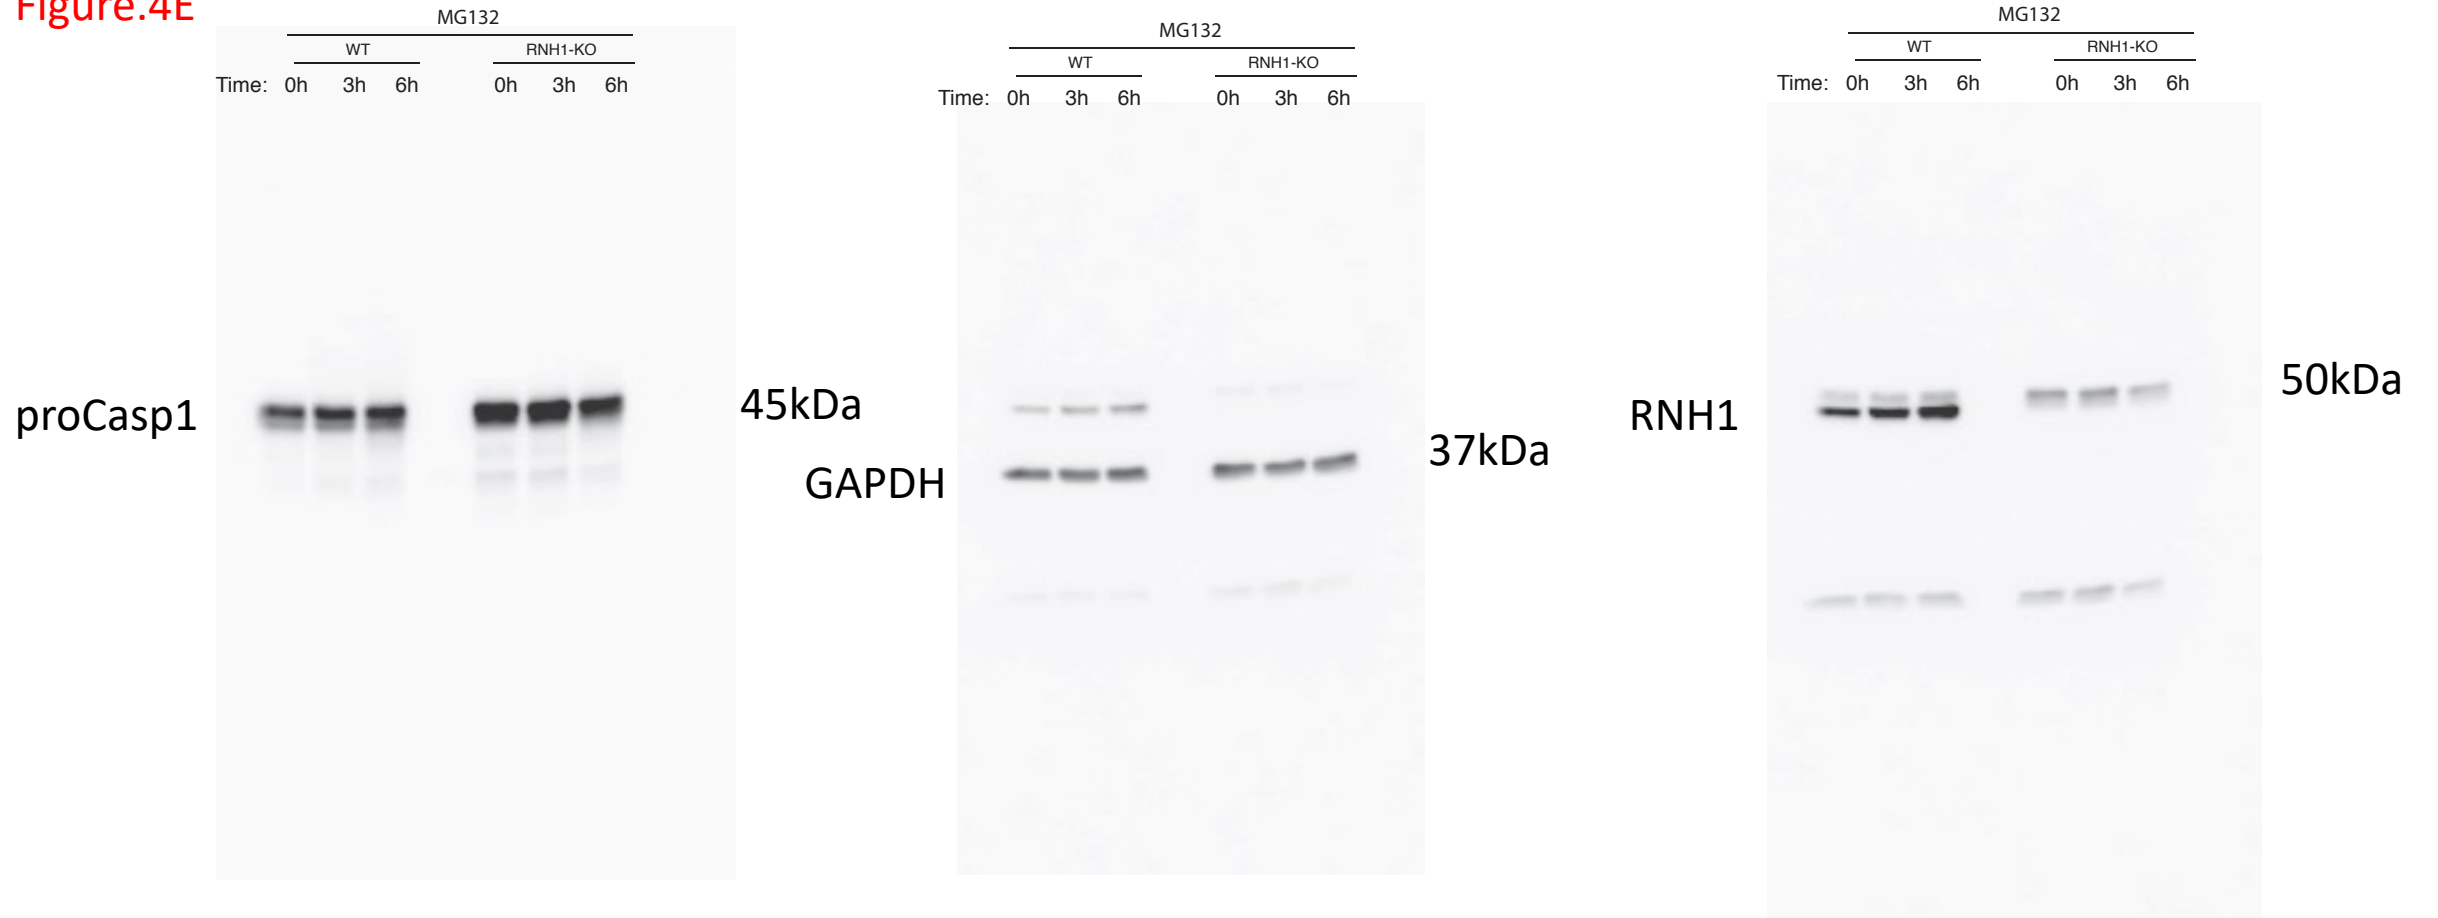

Figure.4F

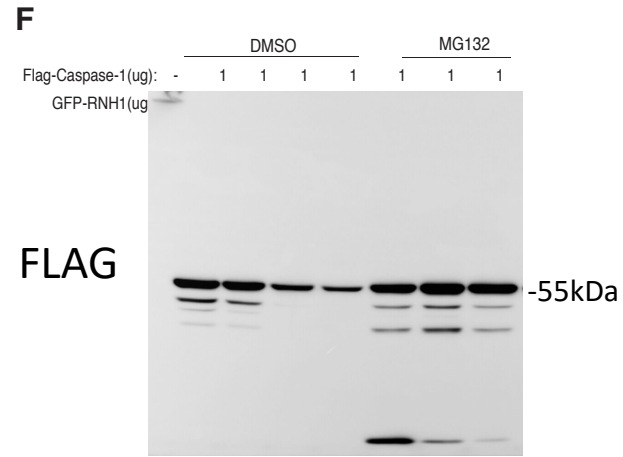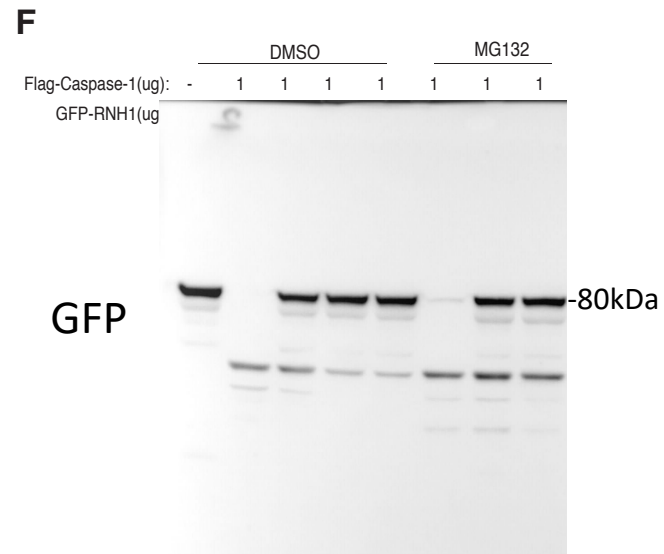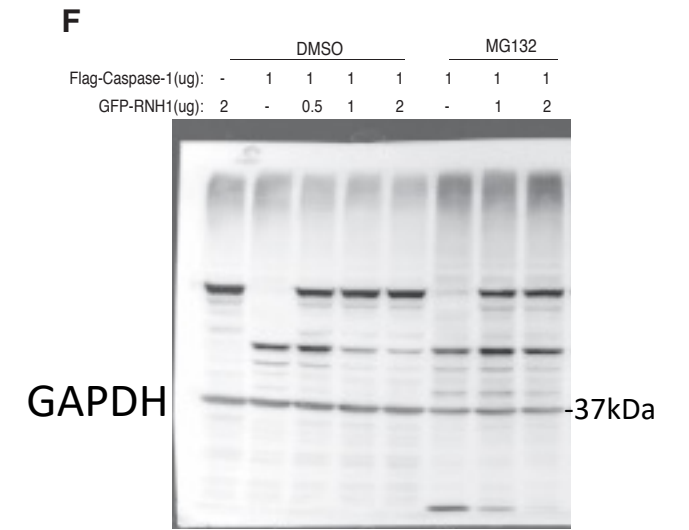

Figure.4G

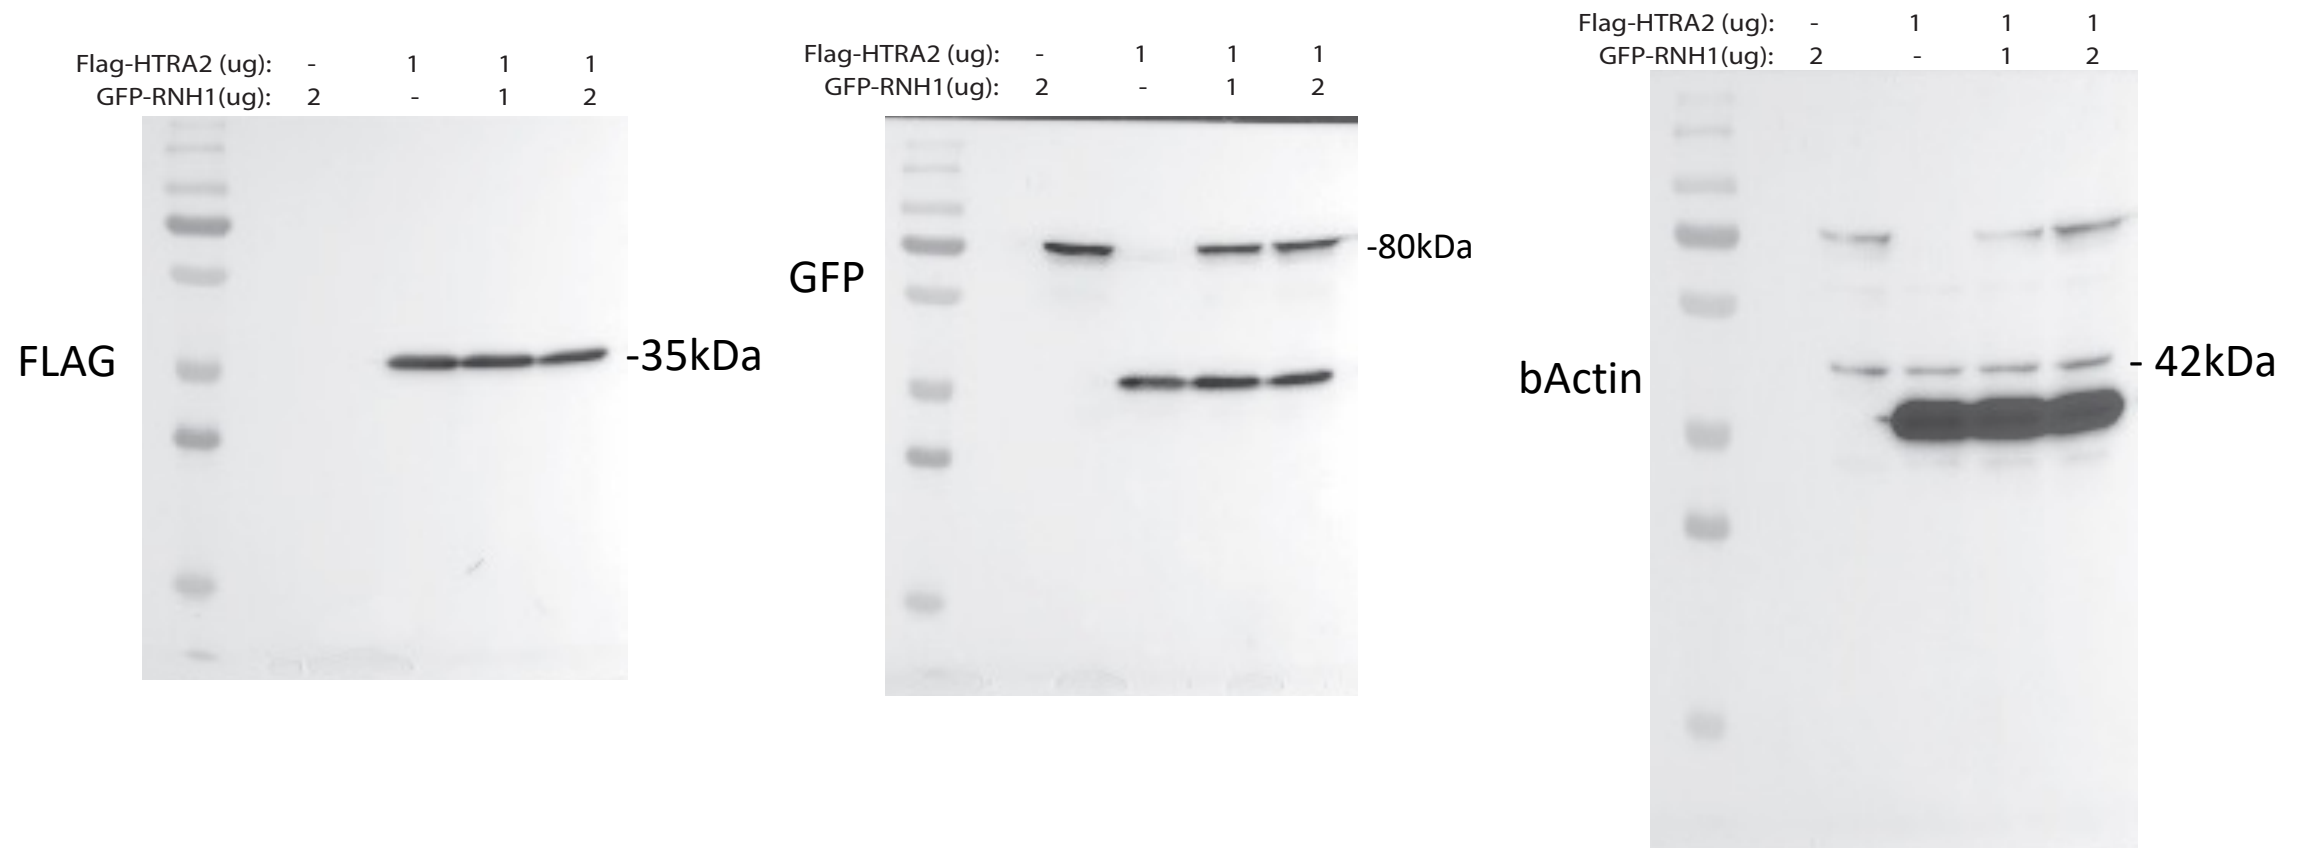

Fig 5C

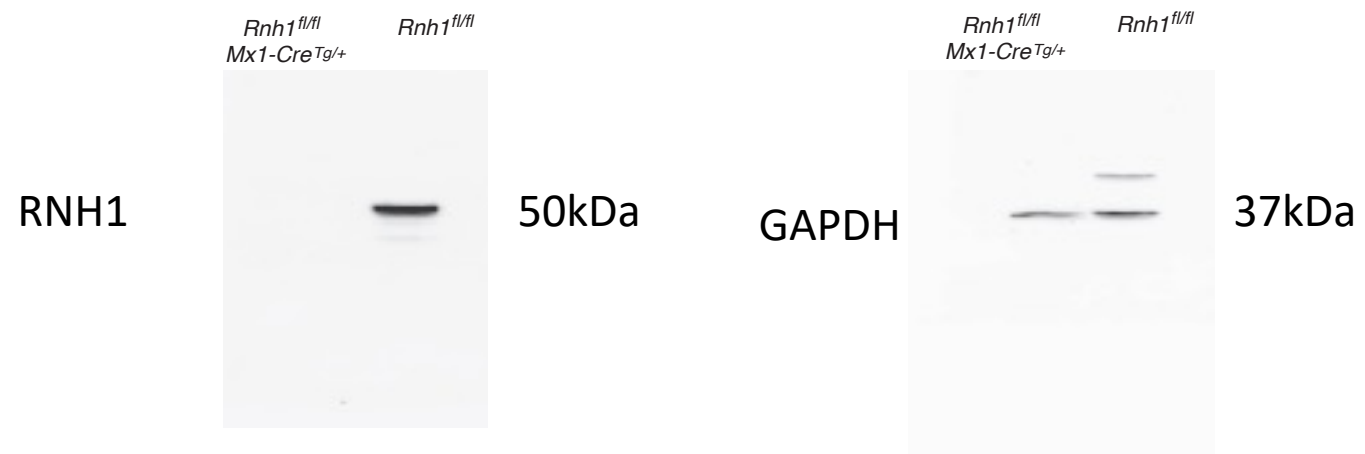

Fig 5E

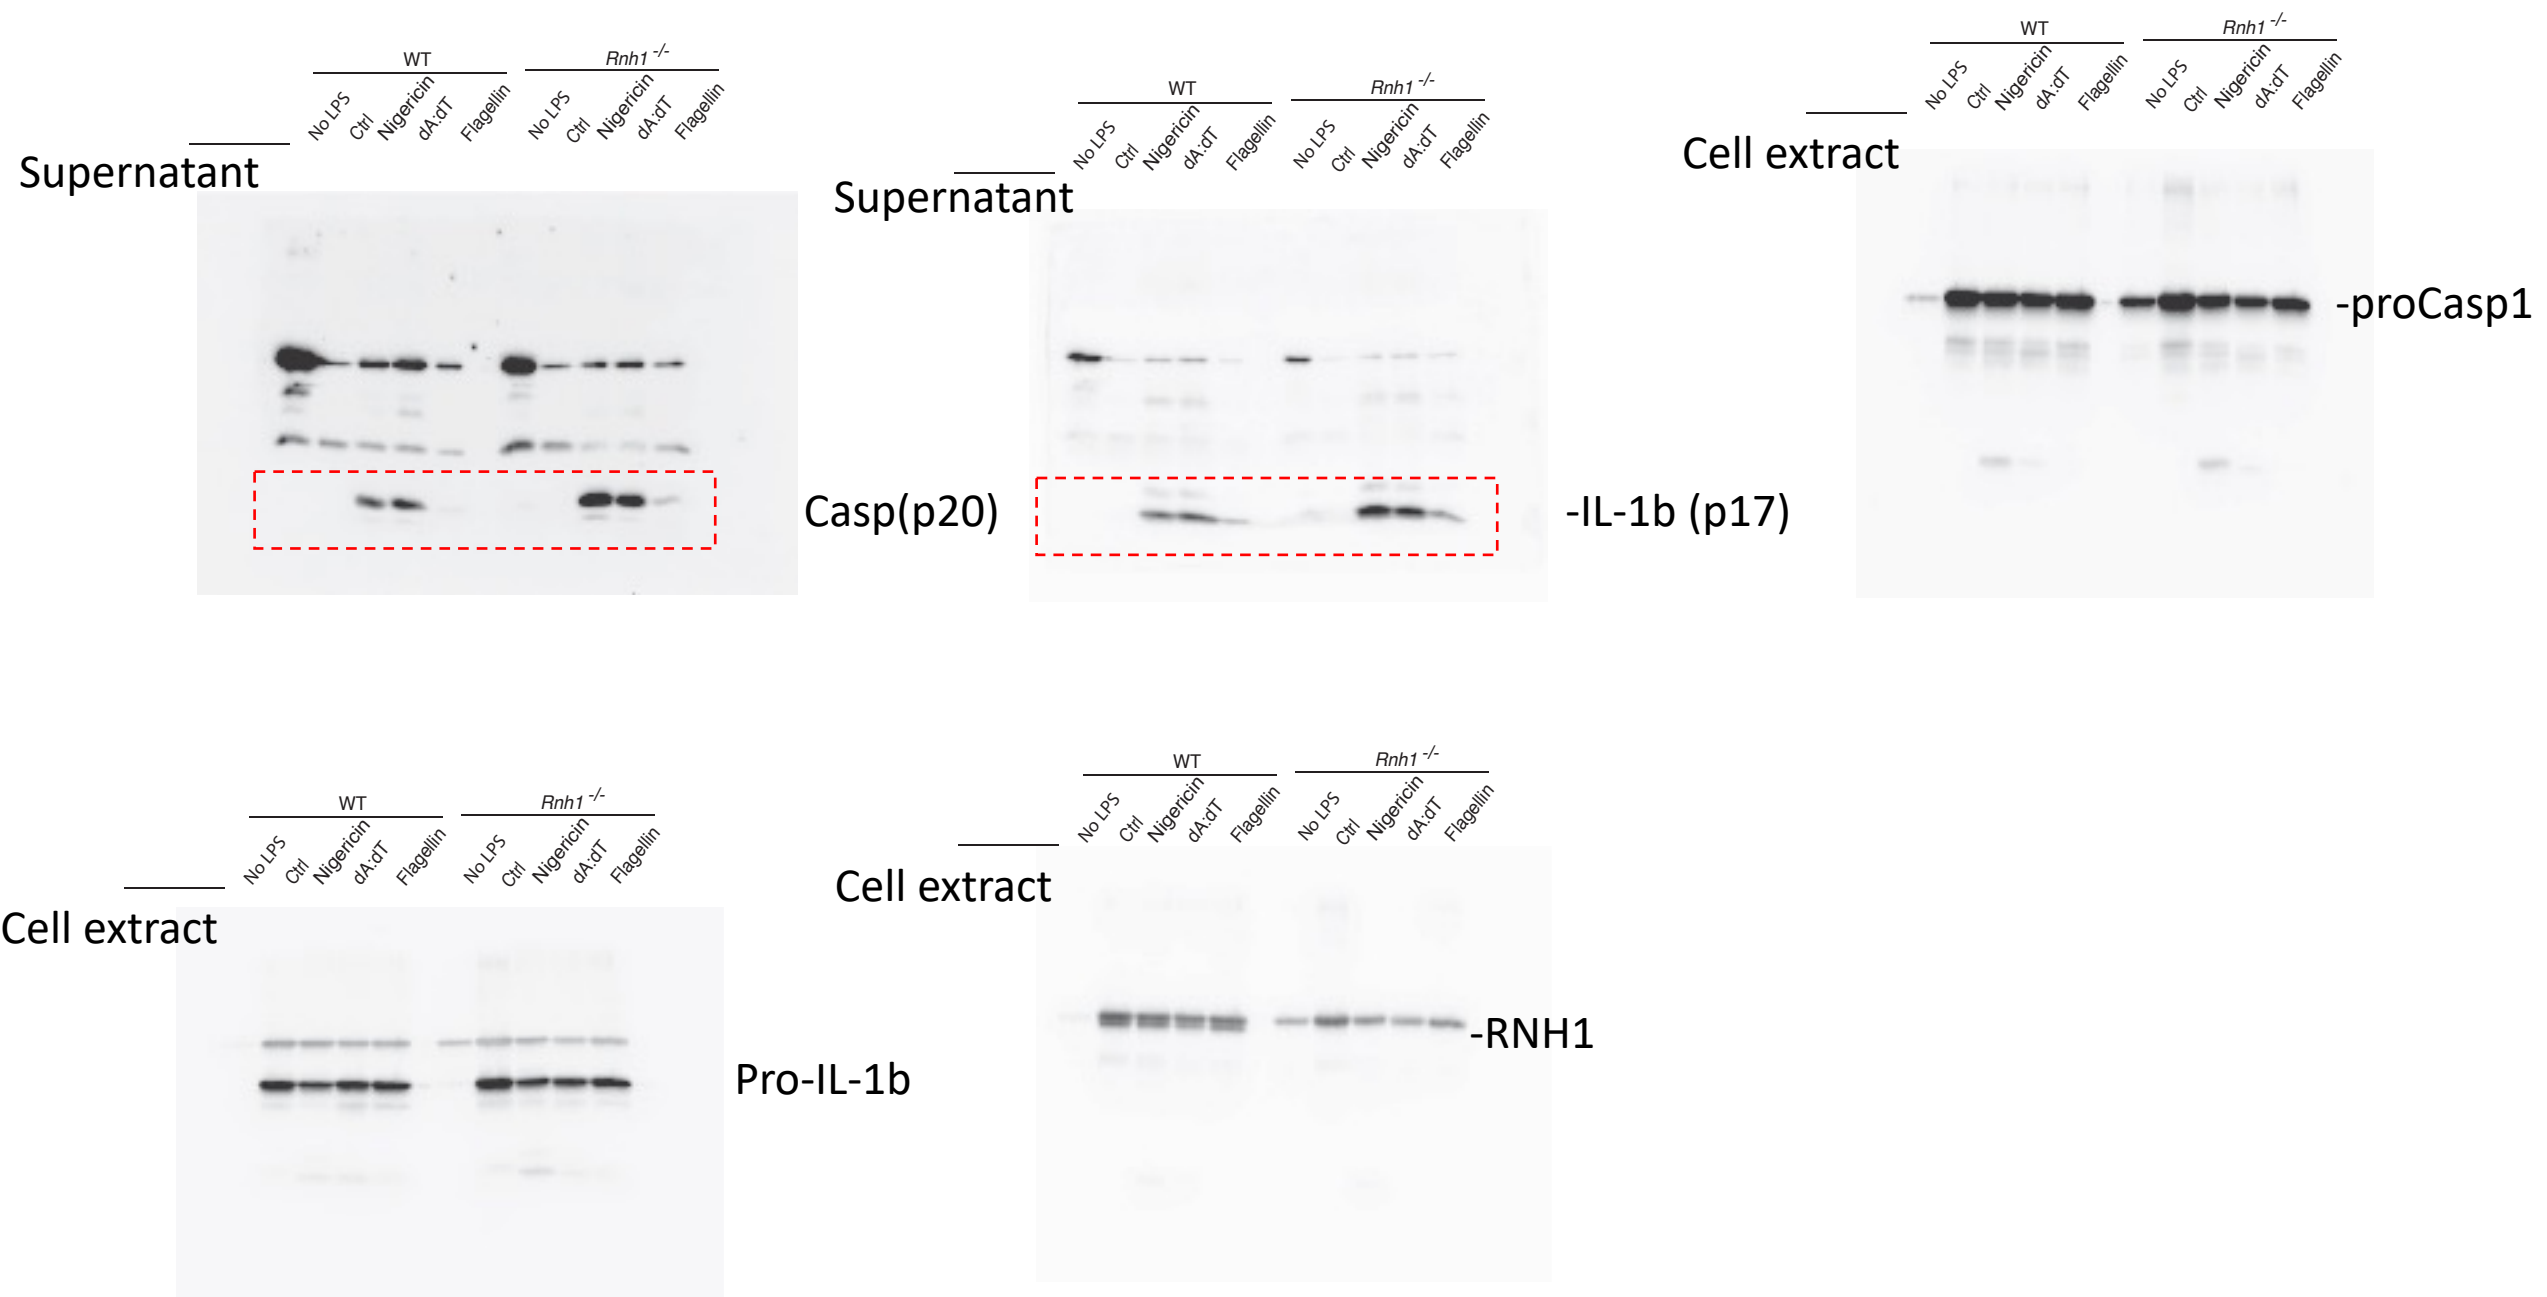



Fig 6A

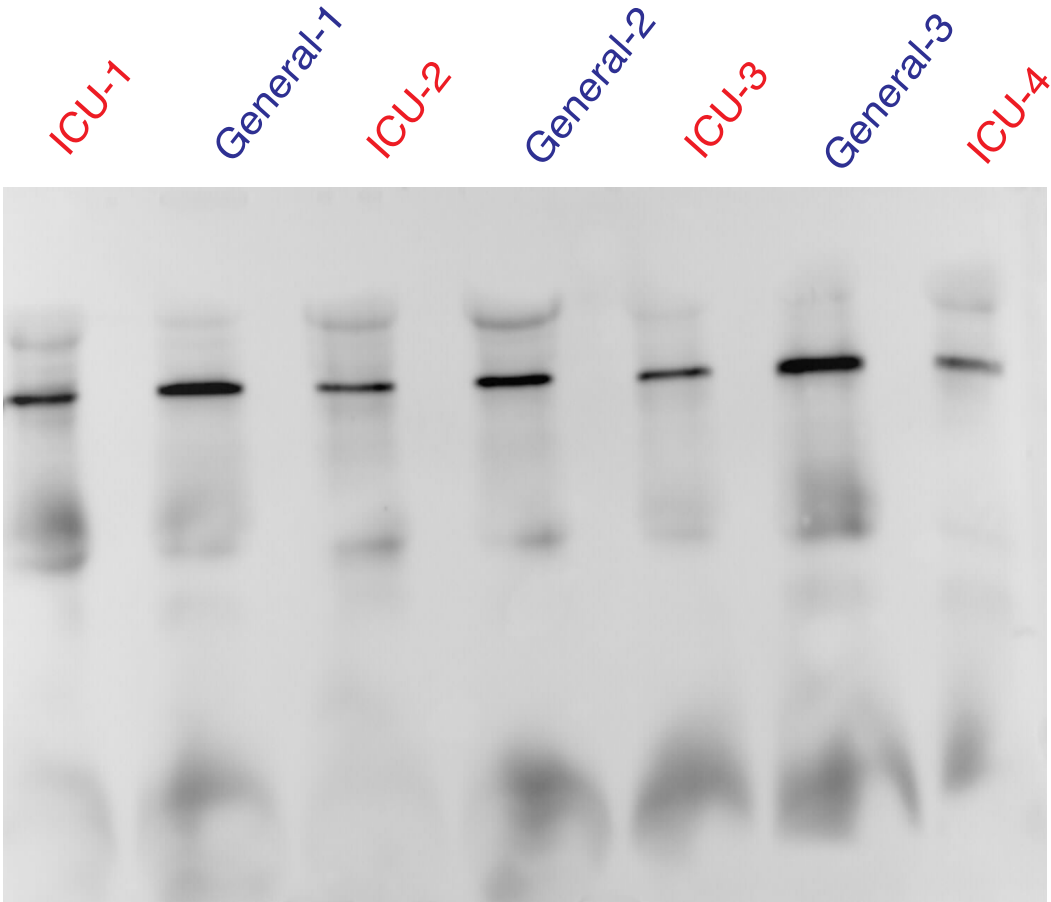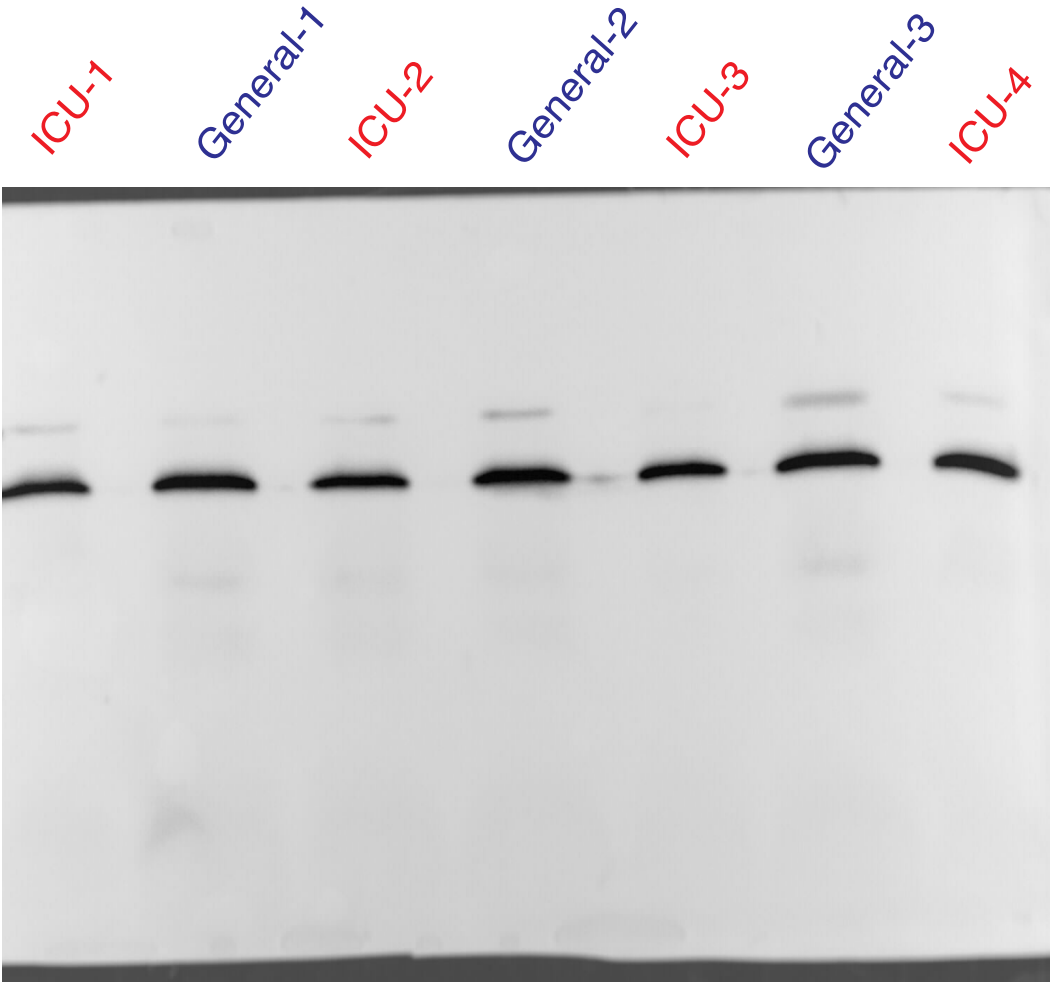

# Sup Fig 1B

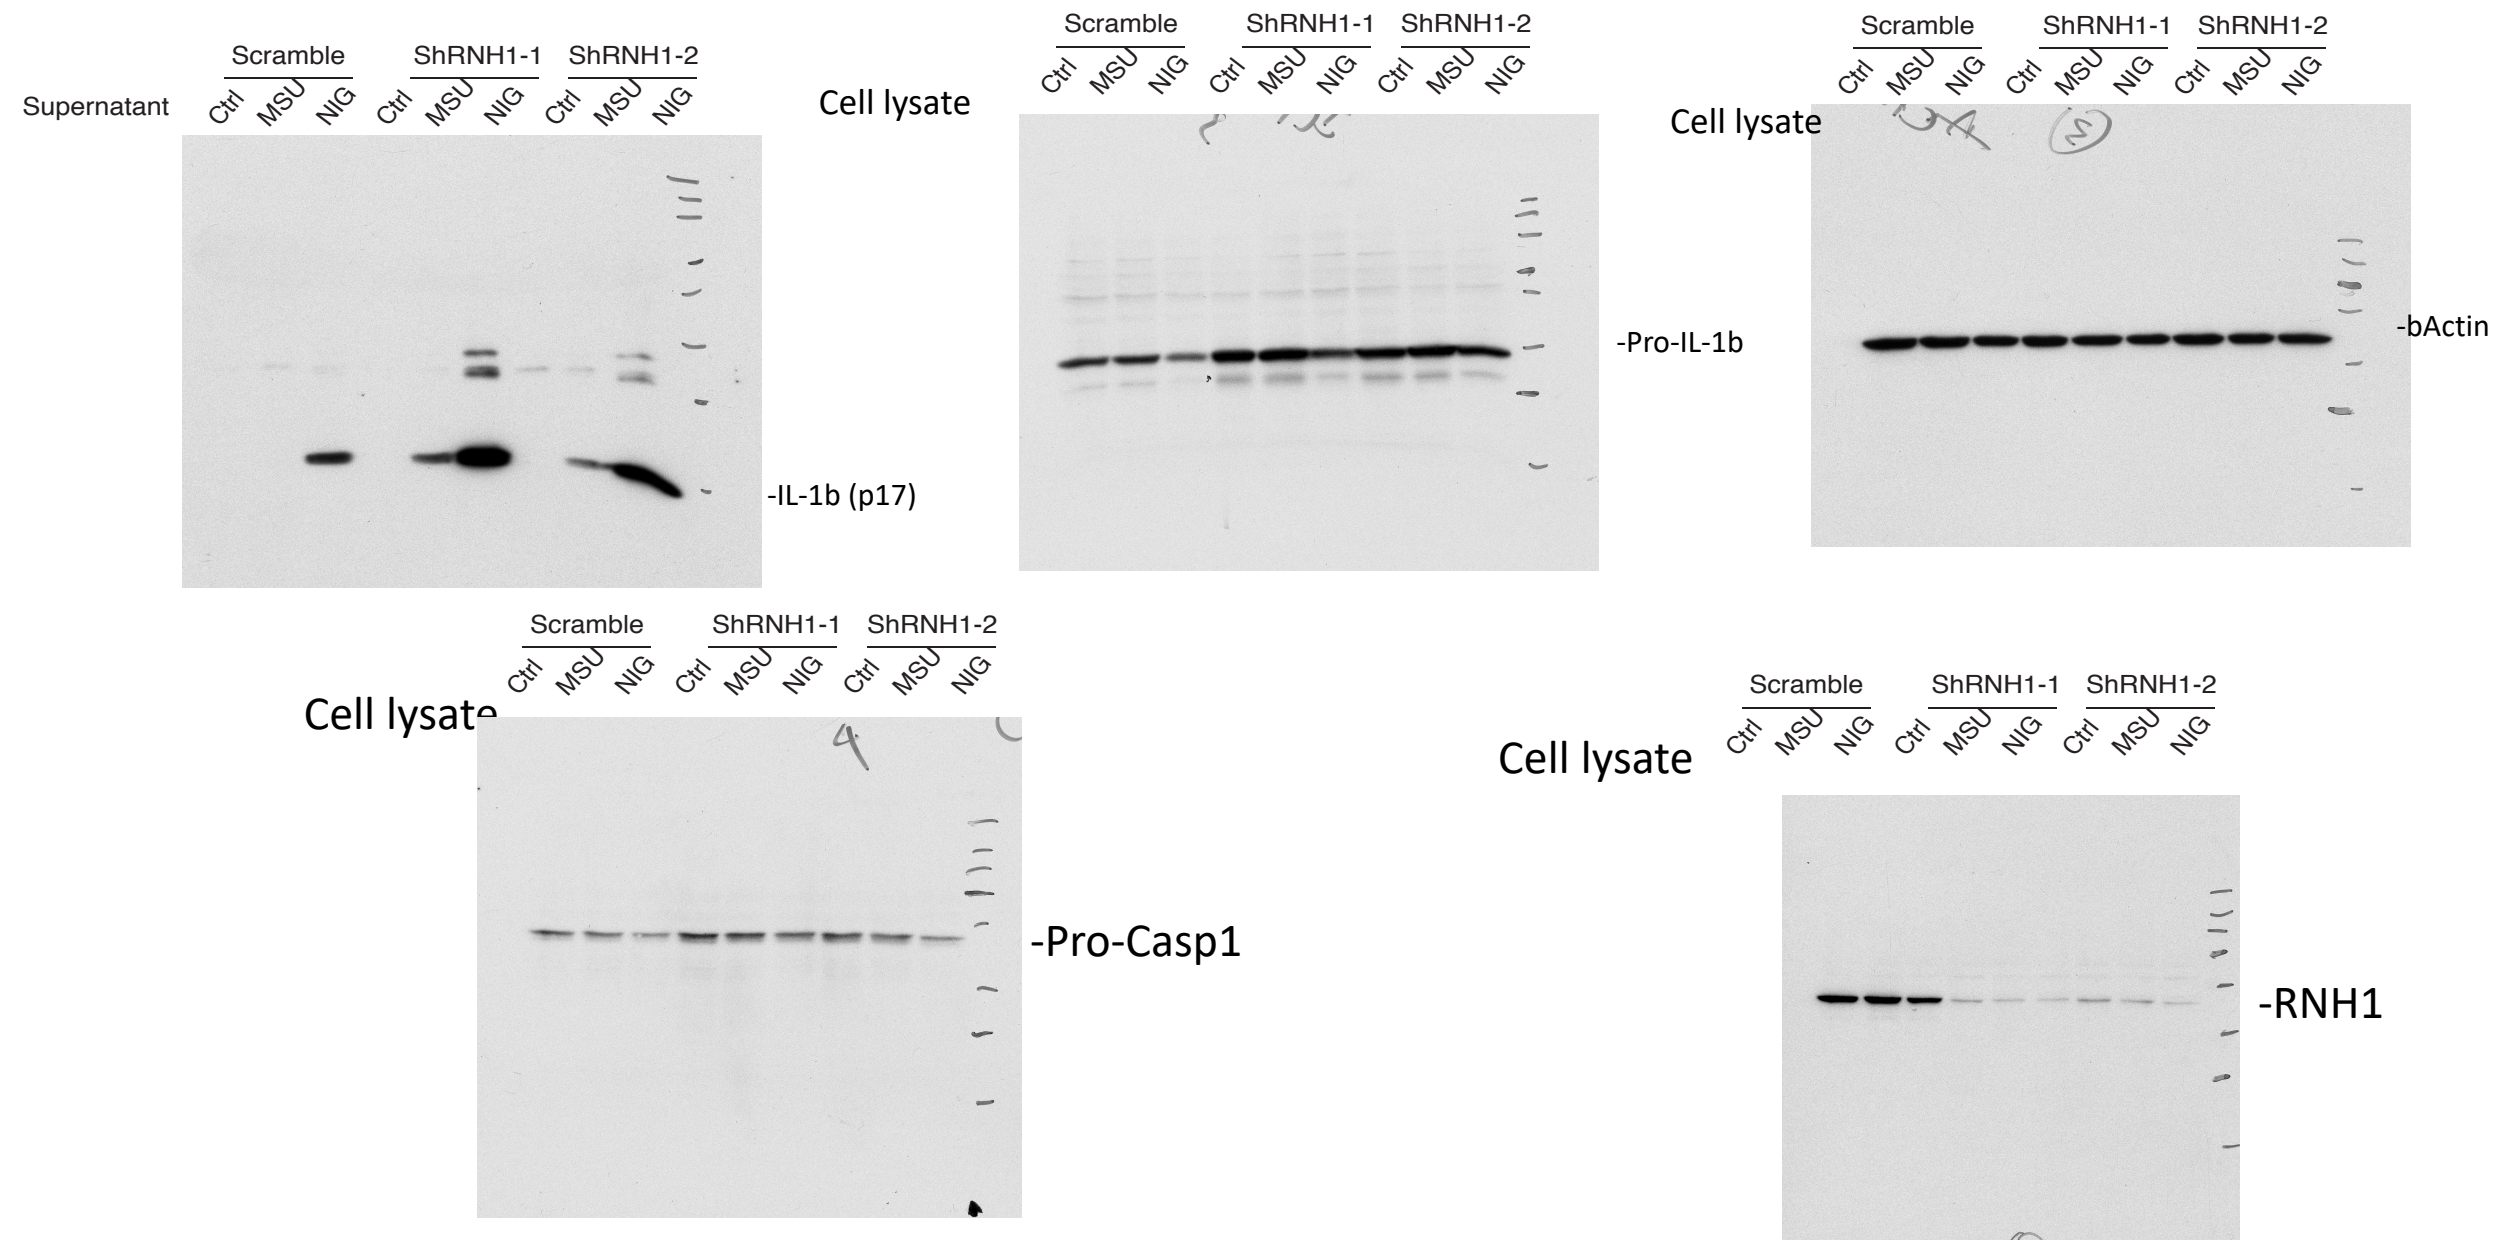



Sup Fig 4

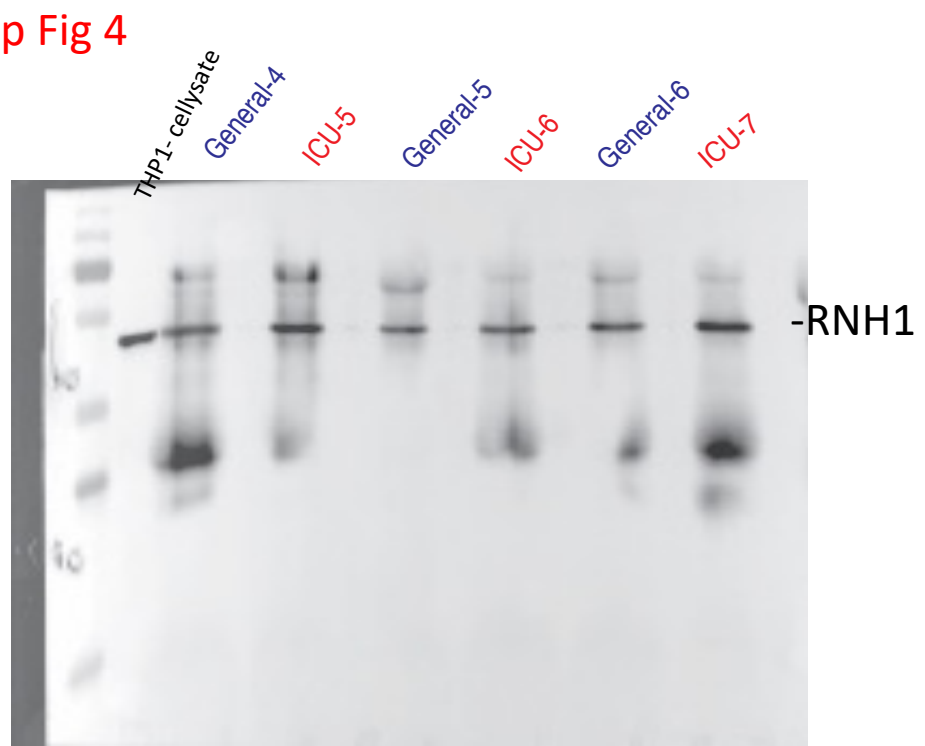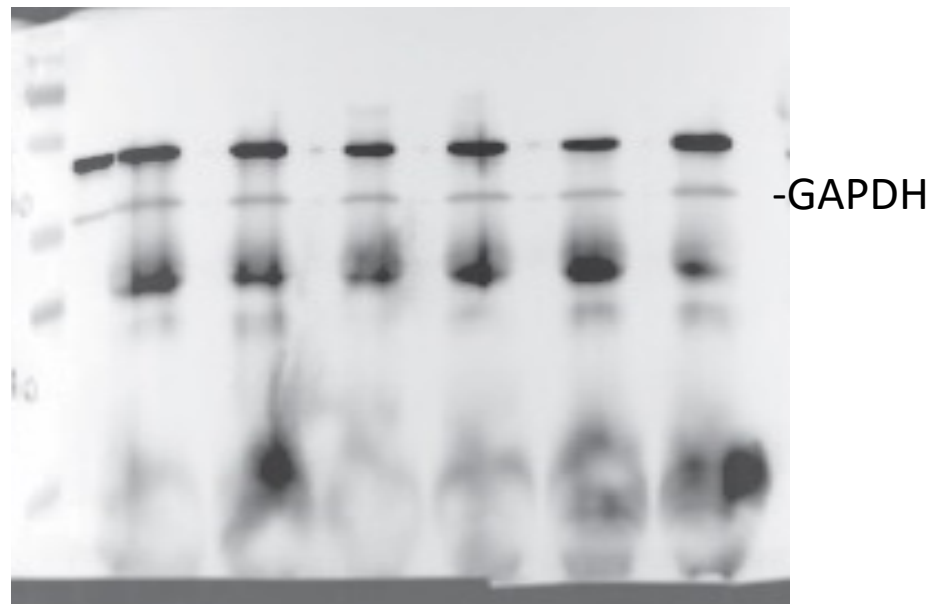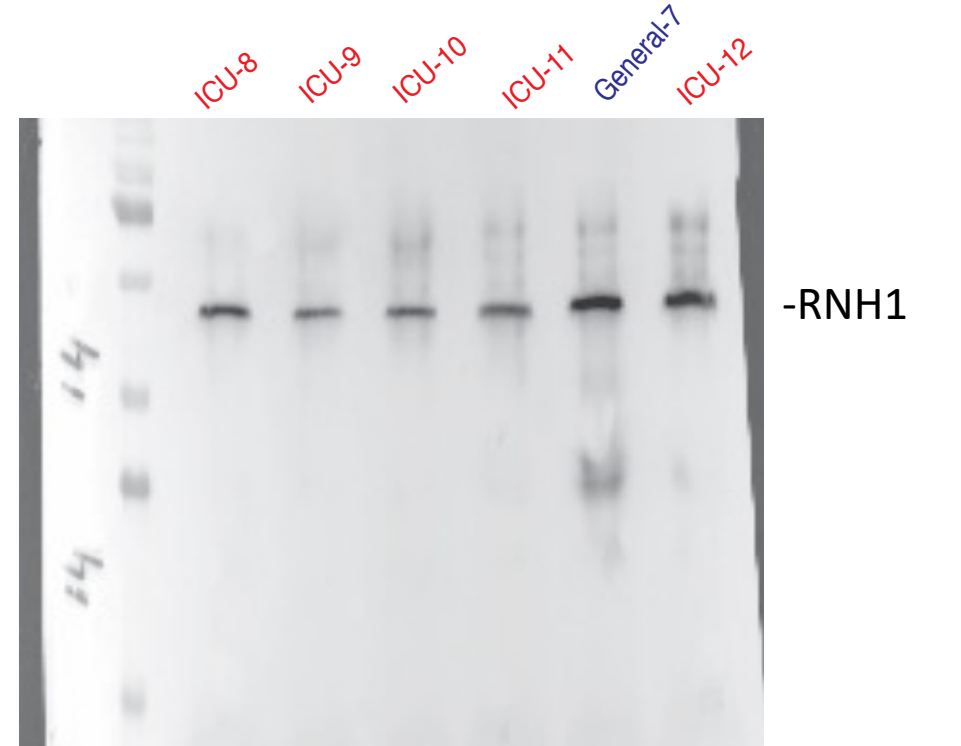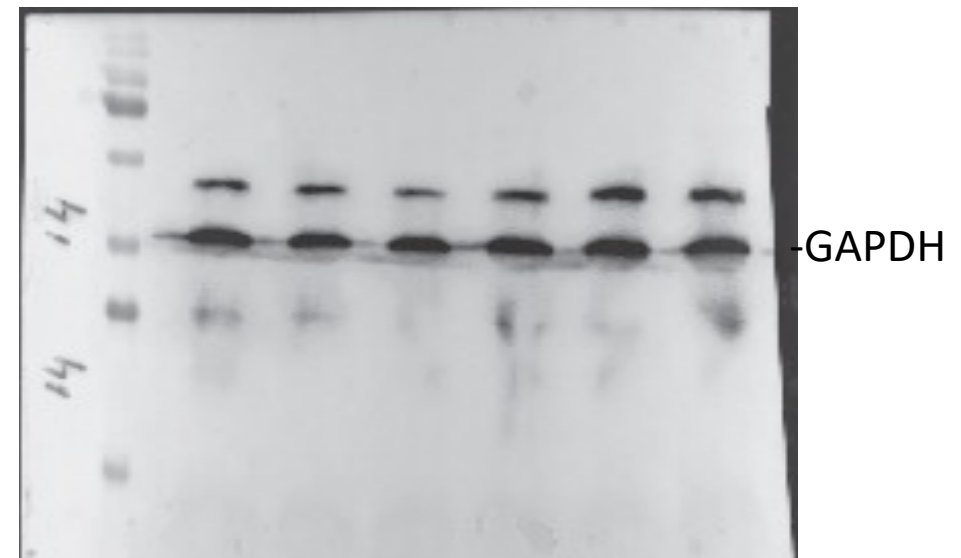

Sup Fig 4

ICU-13  
ICU-14  
General-8  
General-9

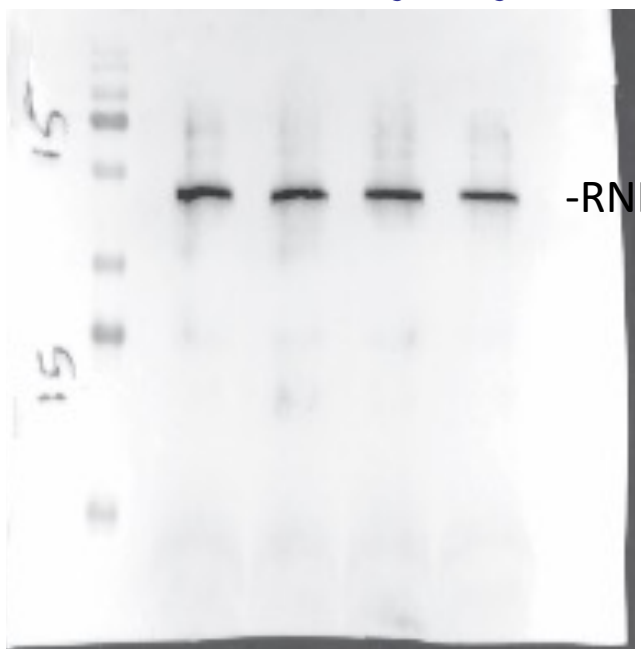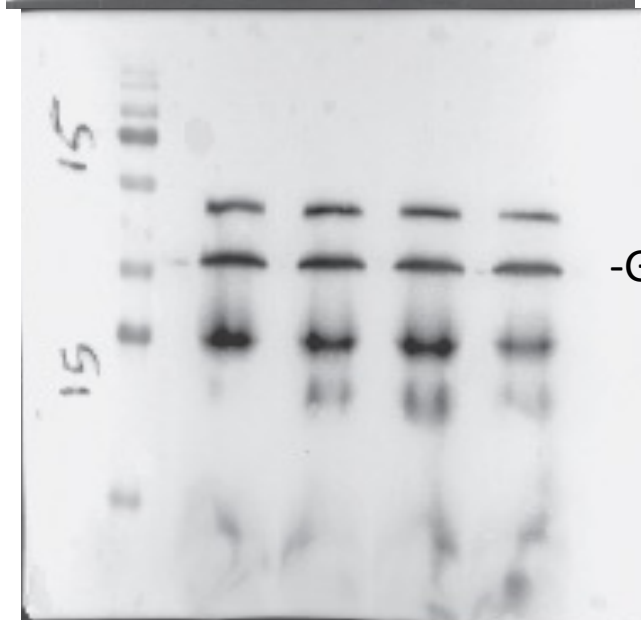

ICU-15  
ICU-16  
ICU-17  
General-10  
General-11

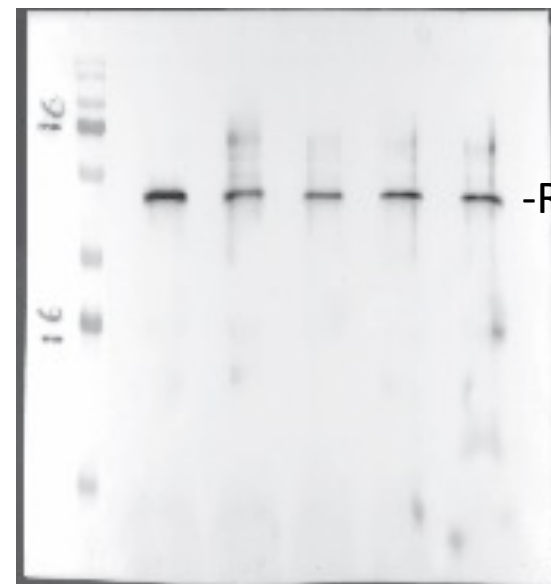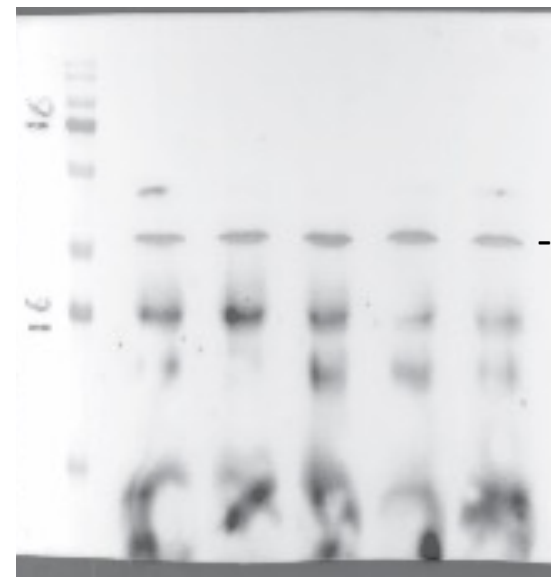

Supplement: inline-supplementary-material-3 [file inline-supplementary-material-3.pdf]
